# Supplementary material for: Does Long-Term High Fat Diet Always Lead to Smaller Hippocampi Volumes, Metabolite Concentrations, and Worse Learning and Memory? A Magnetic Resonance and Behavioral Study in Wistar Rats
Source: PLoS One. 2015 Oct 8;10(10):e0139987. doi: 10.1371/journal.pone.0139987 (PMC4598109; doi:10.1371/journal.pone.0139987)
Supplement: S1 Table — (XLSX) [file pone.0139987.s001.xlsx]

## Sheet: Glucose
NORMA
OZN	6.12	13.12	20.12	27.12	3.01	10.01	17.01	24.01	21.02	7.03	21.03	4.04	11.04	2.05	16.05	30.05	13.06	28.06	10.07	11.08	26.08	5.09	20.09	3.10	30.10
TYDZIEŃ	1	2	3	4	5	6	7	8	12	14	16	18	19	22	24	26	28	30	32	36	38	40	42	44	48
1	126	126	131	108	103	105	104	102	106	99	94	98	100	106	104	103	102	103	101	98	101	95	93	89	88
2	106	117	107	96	107	99	102	100	99	85	84	88	87	91	93	97	99	92	101	99	78	89	91	88	89
3	127	121	110	112	103	94	106	103	92	95	84	90	101	103	97	102	105	95	103	94	88	89	86	83	87
4	119	109	107	117	108	100	91	99	101	95	98	101	100	97	93	106	110	96	106	98	99	99	89	87	87
5	110	119	105	114	103	99	96	103	97	85	87	88	101	98	91	92	99	93	99	-	-	-	-	-	-
6	126	133	123	104	108	89	100	102	95	93	96	97	97	96	87	99	105	93	102	99	84	91	88	86	89
7	122	128	116	98	106	97	109	101	102	104	101	105	102	108	106	99	105	106	100	100	106	86	87	82	91
8	112	98	122	104	108	104	108	99	87	100	95	99	102	96	69	89	110	99	97	94	107	92	94	96	86
9		92	108	102	100	99	103	98	104	89	72	91	94	87	80	89	103	89	88	89	93	92	88	91	88
10		107	101	107	97	101	96	100	84	87	96	101	99	103	97	101	103	101	104	97	91	95	89	93	91
11		111	121	113	104	89	91	97	89	100	86	89	95	99	93	106	115	94	110	100	74	99	99	95	92
12		124	105	108	114	99	105	102	100	101	93	97	99	99	100	97	99	100	99	-	-	-	-	-	-
13		93	111	118	117	107	104	105	104	107	97	90	96	99	91	100	105	91	93	96	90	88	87	89	90
14		105	112	103	97	93	111	107	93	100	109	107	93	101	86	94	98	87	99	97	92	97	91	86	85
15		89	119	112	114	95	106	102	101	102	88	89	103	100	102	103	105	104	103	99	87	91	85	90	89
16		110	117	121	105	106	113	111	111	98	95	97	93	95	87	92	103	89	87	92	97	93	92	102	99
17		117	108	112	117	107	107	108	103	94	97	100	102	98	93	93	105	95	101	99	94	88	90	90	91
18		119	123	122	104	101	103	109	102	92	91	97	99	101	99	98	103	101	102	100	80	89	86	80	83
19		134	119	120	94	101	100	99	99	88	81	85	91	87	83	91	101	103	91	93	76	89	92	85	82
20		117	108	103	106	97	99	105	107	105	87	88	89	80	78	108	107	98	105	96	66	94	99	93	90
21		135	102	125	96	98	101	100	96	94	99	103	100	91	98	101	103	98	95	99	99	86	86	82	88
22		116	106	111	91	101	106	109	98	95	102	105	109	97	98	102	100	98	101	96	95	87	83	88	89
23		116	123	113	121	98	102	99	103	116	104	98	101	93	87	92	95	88	95	99	99	83	94	98	101
24		115	115	109	102	88	96	99	89	63	93	94	78	83	87	104	106	87	88	90	89	88	89	87	-
25		126	94	113	100	100	104	105	104	99	104	106	107	109	102	104	100	101	100	100	90	92	91	95	93
Mean		115.08	112.52	110.6	105	98.68	102.52	102.56	98.64	95.44	93.32	96.12	97.52	96.68	92.04	98.48	103.44	96.04	98.8	96.6957	90.2174	90.9565	89.9565	89.3478	89.4545
SD	REZONANS	12.7113	8.72792	7.47774	7.46659	5.24976	5.56866	3.87384	6.68256	9.89562	8.31023	6.55312	6.58989	7.21526	8.81986	5.6356	4.31161	5.63826	5.84523	3.2674	10.2999	4.18306	4.07295	5.49883	4.36138
DIETA
OZN	6.12	13.12	20.12	27.12	3.01	10.01	17.01	24.01	21.02	7.03	21.03	4.04	11.04	2.05	16.05	30.05	13.06	28.06	10.07	11.08	26.08	5.09	20.09	3.10	30.10
TYDZIEŃ	1	2	3	4	5	6	7	8	12	14	16	18	19	22	24	26	28	30	32	36	38	40	42	44	48
1	110	100	112	103	99	93	109	106	80	91	102	100	97	99	83	100	106	103	102	103	117	111	100	96	100
2	113	84	100	113	100	102	102	103	81	89	109	102	101	99	95	99	100	101	104	110	79	88	94	97	104
3	112	94	102	106	96	98	90	99	100	105	99	101	109	104	106	99	97	103	105	105	106	103	100	103	111
4	91	89	103	120	103	98	92	98	93	94	111	108	110	101	100	105	104	102	114	110	107	112	99	104	82
5	83	100	106	100	94	76	83	86	97	96	105	110	103	99	109	97	93	98	91	90	100	99	97	90	96
6	103	97	101	100	75	98	93	98	100	92	87	91	99	94	104	108	112	108	106	107	88	110	108	106	87
7	93	94	96	90	88	93	91	95	99	104	91	92	103	104	102	101	94	97	102	103	101	100	97	86	61
8	107	96	107	95	95	94	96	93	75	96	106	107	96	92	83	102	108	108	105	104	106	108	102	105	97
9	87	95	96	100	91	106	97	101	109	111	110	111	103	99	104	102	102	106	99	103	121	102	99	95	95
10	82	95	108	95	85	99	83	92	96	91	106	108	101	98	102	99	96	110	116	111	117	115	99	90	91
11	85	94	102	108	96	91	90	96	94	92	94	89	98	101	91	98	105	89	103	100	90	88	94	75	111
12	116	103	94	94	108	105	106	103	101	108	100	103	104	100	54	69	82	99	99	100	111	103	120	119	118
13	112	94	85	94	97	98	107	104	100	94	109	113	99	102	106	107	111	103	99	95	95	102	101	102	96
14	107	106	100	126	104	101	111	108	98	87	106	108	110	102	99	102	100	101	104	99	97	99	103	108	90
15	118	89	76	100	96	99	101	102	99	102	98	100	95	97	101	102	109	105	103	104	82	103	110	109	96
16	86	89	100	119	103	123	121	109	111	99	71	84	93	100	106	97	89	92	99	102	101	100	93	91	101
17	101	104	119	117	101	93	101	110	104	102	100	96	98	89	94	96	102	110	109	112	102	100	100	100	104
18	123	106	96	94	112	96	103	100	101	94	104	101	105	89	69	99	94	99	113	119	103	99	98	92	106
19	108	95	99	104	101	103	105	106	102	90	107	100	103	102	99	104	111	120	106	102	77	89	102	105	96
20	108	89	102	95	99	95	102	99	100	100	99	101	95	93	90	101	100	106	97	103	101	97	100	98	91
21	97	100	98	114	104	103	108	101	99	86	94	90	99	101	92	98	99	100	99	115	95	99	100	100	93
22	106	101	100	102	113	100	101	100	104	99	102	104	106	100	98	101	99	98	102	102	95	93	98	87	101
23		103	100	98	103	85	91	98	106	105	102	99	96	101	90	100	101	94	104	110	104	101	93	94	84
24		101	102	101	99	96	99	102	104	110	101	90	92	88	73	79	86	103	99	98	103	94	101	103	80
25		109	108	113	96	98	103	98	101	99	106	102	99	101	80	88	85	100	110	106	117	110	99	93	96
																								NOWA KARMA
Mean		97.08	100.48	104.04	98.32	97.72	99.4	100.28	98.16	97.44	100.76	100.4	100.56	98.2	93.2	98.12	99.4	102.2	103.6	104.52	100.6	101	100.28	97.92	95.48
SD	REZONANS	6.32403	8.23671	9.72317	8.11234	8.23367	8.93495	5.50394	8.44433	7.11266	8.62303	7.64308	5.0173	4.65475	13.3385	8.35823	8.22091	6.40963	5.67891	6.32535	11.5542	7.28011	5.70468	9.11921	11.5835
p-value		0.0120932	0.116531	0.612431	0.529943	0.529176	0.897539	0.731892	0.479372	0.204373	0.00913509	0.0512701	0.0881289	0.199773	0.363498	0.48662	0.744584	0.00690608	0.0202069	0.000734241	0.00166209	3.995e-05	5.8513e-06	0.00058585	0.0147914
%-diff		0.169683	0.113052	0.0611256	0.0657092	0.00977597	0.0309033	0.0224808	0.00487805	-0.0207383	-0.0766694	-0.0435579	-0.0306947	-0.0155993	-0.0125243	0.00366226	0.0398344	-0.0621469	-0.0474308	-0.0777708	-0.108822	-0.104643	-0.108533	-0.0915499	-0.0651631

## Sheet: CaloricConsumption
TYDZIEŃ	1	2	3	4	5	6	7	8	9	10	11	12	13	14	15	16	17	18	19	20	21	22	23	24	25	26	27	28	29	30	31	32	33	34	35	36	37	38	39	40	41	42	43	44	45	46	47	48	49
TYDZIEŃ	1	2	3	4	5	6	7	8	9	10	11	12	13	14	15	16	17	18	19	20	21	22	23	24	25	26	27	28	29	30	31	32	33	34	35	36	37	38	39	40	41	42	43	44	45	46	47	48	49
N1	18	18	19	22	21	20	19	22				20	21	20	23	21	20	23	21			23	21	24	22	23	22	22	23	22	23	24			30	25	27	25	27	31	29	27	26	25	24			22	22
N2	16	14	17	19	19	18	18	20				18	17	20	21	19	18	20	19			22	20	21	20	21	20	21	20	22	24	26			33	24	25	25	25	34	28	26	28	28	23			21	20
N3	15	22	16	17	18	17	18	19				22	25	21	20	18	17	18	23			22	21	20	20	21	19	21	21	20	21	23			27	25	25	23	24	28	28	26	25	22	23			22	20
N4	15	14	16	16	18	19	17	19				21	17	18	20	18	17	17	22			23	19	22	20	22	21	20	20	24	24	26			31	23	26	27	26	32	29	25	28	26	22			20	21
N5	15	17	16	15	18	19	21	19				16	20	19	20	18	17	16	17			21	24	23	22	23	21	24	22	21	23	25			30	-	-	-	-	-	-	-	-	-	-			-	-
N6	16	16	17	20	19	18	19	20				21	19	24	21	19	18	21	22			20	20	22	21	22	20	22	21	22	24	26			30	24	26	25	25	31	26	27	28	25	24			21	21
N7	16	17	17	21	19	18	18	20				19	20	22	21	19	18	22	20			21	20	23	21	22	20	21	22	24	25	27			31	24	26	27	25	32	27	26	29	26	23			21	21
N8	14	17	15	16	17	18	16	18				20	20	19	19	17	16	17	21			22	21	20	20	21	20	19	21	23	25	25			30	25	25	26	25	31	28	24	27	25	21			22	20
N9	18	18	19	21	21	23	19	22				18	21	20	23	21	20	22	19			26	24	23	23	25	25	22	22	27	30	33			34	28	29	30	30	35	32	27	35	29	24			25	24
N10	18	18	19	20	21	22	20	22				22	21	21	23	21	20	21	23			24	22	23	24	24	24	23	24	25	28	31			32	26	28	28	29	33	30	28	33	27	25			23	23
N11	10	11	11	15	13	16	14	14				18	14	15	15	13	12	16	19			19	21	19	19	20	18	17	22	19	16	21			30	25	24	22	23	31	25	22	23	25	19			22	19
N12	16	18	17	20	19	23	21	20				20	21	22	21	19	18	21	21			21	20	22	26	23	25	24	29	22	24	24			27	-	-	-	-	-	-	-	-	-	-			-	-
N13	16	15	17	21	19	19	17	20				20	18	20	21	19	18	22	21			21	22	21	22	22	21	20	26	21	22	23			24	26	26	24	26	25	27	25	25	19	22			23	21
N14	15	16	16	18	18	20	21	19				21	19	19	20	18	17	19	22			21	19	23	25	23	22	24	29	27	26	28			29	23	27	30	27	30	27	29	30	24	26			20	22
N15	13	14	14	17	16	19	17	17				22	17	19	18	16	15	18	23			20	18	24	22	22	21	20	25	20	20	22			25	22	26	23	26	26	26	25	24	20	22			19	21
N16	17	17	18	21	20	21	21	21				21	20	19	22	20	19	22	22			23	21	22	25	23	23	24	28	25	24	25			32	25	27	28	28	33	29	29	27	27	26			22	22
N17	15	17	16	18	18	21	18	19				20	20	21	20	18	17	19	21			21	21	23	23	23	23	21	26	23	24	26			29	25	27	26	28	30	27	26	28	24	23			22	22
N18	15	18	16	19	18	17	18	19				20	21	20	20	18	17	20	21			20	20	21	22	22	19	21	27	27	28	30			34	24	26	30	24	35	26	26	32	29	23			21	21
N19	17	22	18	21	20	21	20	21				20	25	21	22	20	19	22	21			23	22	22	25	24	23	23	28	24	25	27			31	26	28	27	28	32	29	28	29	26	25			23	23
N20	16	22	17	20	19	22	16	20				22	25	22	21	19	18	21	23			23	22	23	24	24	24	19	29	25	26	26			30	26	28	28	29	31	29	24	28	25	21			23	23
N21	17	22	18	20	20	24	20	21				21	25	21	22	20	19	21	22			25	24	25	26	25	26	23	28	24	25	25			29	28	29	27	31	30	31	28	27	24	25			25	24
N22	15	21	16	19	18	20	20	19				21	24	25	20	18	17	20	22			22	23	23	24	24	22	23	28	24	25	25			29	27	28	27	27	30	28	28	27	24	25			24	23
N23	19	23	20	16	22	27	24	23				23	26	22	24	22	21	17	24			28	29	26	30	28	29	27	33	30	31	32			29	33	32	33	34	30	34	32	34	24	29			30	27
N24	14	20	15	19	17	18	17	18				22	23	18	19	17	16	20	23			21	22	21	22	22	20	20	26	23	23	24			26	26	26	26	25	27	27	25	26	-	-			-	-
N25	16	21	17	18	19	23	21	20				21	24	21	21	19	18	19	22			24	23	23	26	25	25	24	28	26	25	25			27	27	29	29	30	28	30	29	27	22	26			24	24
Mean_kcal	47.9694	54.8222	51.0287	57.392	57.1472	61.5526	57.5143	60.2065	#DIV/0!	#DIV/0!	#DIV/0!	62.2868	64	62.2868	63.2658	57.1472	54.088	60.4512	65.3461	#DIV/0!	#DIV/0!	68.0382	65.9579	68.4054	70.2409	70.2409	67.6711	66.6922	76.8489	72.1989	74.7686	79.4187	#DIV/0!	#DIV/0!	90.4321	78.078	82.4674	81.9353	82.7334	93.7734	86.7238	81.4033	85.9257	75.9256	72.4492	#DIV/0!	#DIV/0!	68.8337	67.304
Mean_proteine [g]	3.48096	3.97824	3.70296	4.16472	4.14696	4.46664	4.1736	4.36896	#DIV/0!	#DIV/0!	#DIV/0!	4.51992	4.64424	4.51992	4.59096	4.14696	3.92496	4.38672	4.74192	#DIV/0!	#DIV/0!	4.93728	4.78632	4.96392	5.09712	5.09712	4.91064	4.8396	5.57664	5.2392	5.42568	5.76312	#DIV/0!	#DIV/0!	6.56232	5.66583	5.98435	5.94574	6.00365	6.80478	6.29322	5.90713	6.2353	5.50964	5.25736	#DIV/0!	#DIV/0!	4.995	4.884
Mean_fibre [g]	0.551309	0.630067	0.586469	0.659602	0.656789	0.707419	0.661008	0.691949	#DIV/0!	#DIV/0!	#DIV/0!	0.715858	0.735547	0.715858	0.727109	0.656789	0.621629	0.694762	0.751018	#DIV/0!	#DIV/0!	0.781958	0.75805	0.786178	0.807274	0.807274	0.777739	0.766488	0.883219	0.829776	0.85931	0.912754	#DIV/0!	#DIV/0!	1.03933	0.897344	0.947791	0.941677	0.950849	1.07773	0.99671	0.935562	0.987537	0.872607	0.832653	#DIV/0!	#DIV/0!	0.7911	0.77352
TYDZIEŃ	1	2	3	4	5	6	7	8	9	10	11	12	13	14	15	16	17	18	19	20	21	22	23	24	25	26	27	28	29	30	31	32	33	34	35	36	37	38	39	40	41	42	43	44	45	46	47	48	49
D1	9	9	8	9	10	10	9	9				12	10	11	10	9	10	10	10			13	11	10	10	10	10	10	11	12	13	12			12	13	14	15	14	13	12	11	12	13	13			16	12
D2	8	10	12	11	9	11	10	11				14	14	14	12	10	12	11	10			13	11	12	11	12	12	12	11	12	11	12			12	13	14	15	14	13	12	11	12	13	13			16	12
D3	8	8	9	10	9	10	10	10				13	11	12	10	8	11	11	10			13	11	10	10	11	11	11	11	11	10	11			11	14	14	14	13	12	13	10	11	12	14			17	12
D4	11	10	13	12	12	12	12	13				16	15	15	12	11	14	12	10			15	12	13	11	13	14	12	13	15	13	9			11	13	13	12	11	13	13	10	12	10	14			16	11
D5	9	8	10	10	10	10	10	10				13	12	12	10	9	11	10	10			13	10	11	12	11	11	10	11	10	11	9			15	12	13	11	12	12	11	14	11	9	12			15	11
D6	6	7	9	8	7	8	7	8				11	11	11	9	8	9	10	9			12	9	10	11	10	9	10	10	9	10	9			13	14	14	14	14	13	12	12	12	12	13			17	12
D7	10	10	9	10	11	11	11	12				15	11	13	11	10	13	12	11			16	12	12	13	12	13	12	14	13	12	11			13	15	16	15	13	12	14	12	11	13	15			18	14
D8	9	12	13	11	10	12	11	14				17	15	16	13	12	15	13	10			15	13	14	12	14	15	13	13	14	13	12			13	12	13	14	16	14	14	12	13	12	15			15	11
D9	7	12	13	11	8	11	10	14				17	15	16	12	12	15	14	11			14	13	14	12	14	15	14	12	13	12	11			11	12	14	14	14	13	13	10	12	12	14			15	12
D10	9	11	14	13	10	12	12	11				14	16	15	13	11	12	13	11			14	12	12	11	13	12	12	12	11	12	13			15	14	14	13	13	14	12	14	13	11	13			17	12
D11	10	11	13	12	11	12	12	13				16	15	15	13	12	14	13	12			15	13	14	13	14	14	14	13	11	11	12			11	13	13	15	15	13	13	10	12	13	14			16	11
D12	10	15	12	10	11	12	11	15				18	14	16	13	13	16	15	11			16	14	15	14	14	16	16	14	15	14	13			15	15	15	15	14	13	13	14	12	13	14			18	13
D13	13	12	10	10	14	12	12	13				16	12	14	12	11	14	13	11			12	13	13	12	13	14	11	10	10	13	14			13	14	15	15	12	12	12	12	11	13	13			17	13
D14	13	10	9	9	14	12	12	10				13	11	12	11	9	11	10	12			15	11	11	14	11	11	13	13	14	15	15			12	13	14	16	15	14	14	11	13	14	15			16	12
D15	8	12	10	11	9	11	10	11				14	12	13	12	10	12	11	10			13	11	12	13	12	12	13	11	11	12	12			14	15	14	15	14	13	13	13	12	13	14			18	12
D16	9	11	9	10	10	11	10	11				14	11	12	12	10	12	11	11			13	11	12	11	12	12	11	11	12	13	12			16	17	16	17	14	14	13	15	13	15	14			20	14
D17	7	11	9	8	8	10	9	10				13	11	12	11	10	11	10	10			13	10	11	12	11	11	11	11	10	11	12			18	17	15	15	13	13	12	17	12	13	13			20	13
D18	13	12	13	12	14	14	13	15				18	15	16	14	13	16	13	11			14	13	15	13	14	16	13	12	11	11	11			16	15	16	16	14	13	12	15	12	14	13			18	14
D19	9	11	9	10	10	10	10	9				12	11	11	11	9	10	13	12			12	12	10	11	11	10	11	10	11	12	11			16	16	14	15	13	12	11	15	11	13	12			19	12
D20	11	11	11	10	12	12	11	13				16	13	14	12	11	14	15	14			15	14	13	12	14	14	13	13	13	12	10			15	14	15	16	15	14	14	14	13	14	15			17	13
D21	11	11	11	10	12	12	11	13				16	13	14	12	11	14	13	13			16	13	13	13	13	14	13	14	12	11	14			14	16	15	15	13	14	12	13	13	13	13			19	13
D22	10	11	12	10	11	12	11	11				14	14	14	12	11	12	11	10			13	11	12	12	12	12	12	11	12	10	11			15	14	15	16	15	14	13	14	13	14	14			17	13
D23	9	13	10	9	10	11	10	12				15	12	13	12	11	13	12	11			14	12	13	13	12	13	13	12	12	10	13			15	15	16	17	16	15	14	14	14	15	15			18	14
D24	9	13	9	9	10	11	10	9				12	11	11	12	10	10	12	11			13	11	11	12	11	10	12	11	11	12	12			16	17	16	17	16	14	14	15	13	15	15			20	14
D25	8	12	8	8	9	10	9	9				12	10	11	11	9	10	13	12			13	12	11	12	11	10	11	11	10	11	12			18	19	17	18	16	16	15	17	15	16	16			22	15
																																			Nowa karma
Mean	9.44	10.92	10.6	10.12	10.44	11.16	10.52	11.44	#DIV/0!	#DIV/0!	#DIV/0!	14.44	12.6	13.32	11.68	10.4	12.44	12.04	10.92	#DIV/0!	#DIV/0!	13.8	11.8	12.16	12	12.2	12.44	12.12	11.8	11.8	11.8	11.72	#DIV/0!	#DIV/0!	14	14.48	14.6	15	13.96	13.32	12.84	13	12.32	13	13.84	#DIV/0!	#DIV/0!	17.48	12.6
SD	1.82757	1.73013	1.84842	1.30128	1.82757	1.17898	1.29486	2.00167	#DIV/0!	#DIV/0!	#DIV/0!	2.00167	1.84842	1.77294	1.14455	1.38444	2.00167	1.51327	1.11505	#DIV/0!	#DIV/0!	1.25831	1.25831	1.51877	1.08012	1.32288	2.00167	1.42361	1.25831	1.58114	1.29099	1.51438	#DIV/0!	#DIV/0!	2.10159	1.78232	1.11803	1.55456	1.33791	0.988264	1.02794	2.10159	0.988264	1.55456	1.02794	#DIV/0!	#DIV/0!	1.78232	1.11803
CV	0.193598	0.158436	0.17438	0.128585	0.175054	0.105644	0.123086	0.174971	#DIV/0!	#DIV/0!	#DIV/0!	0.13862	0.1467	0.133104	0.0979925	0.133119	0.160906	0.125687	0.102111	#DIV/0!	#DIV/0!	0.0911816	0.106636	0.124899	0.0900103	0.108432	0.160906	0.11746	0.106636	0.133995	0.109406	0.129213	#DIV/0!	#DIV/0!	0.150113	0.123088	0.0765777	0.103638	0.0958387	0.074194	0.0800579	0.161661	0.0802163	0.119582	0.0742733	#DIV/0!	#DIV/0!	0.101963	0.0887329
Mean_kcal	51.4417	59.5067	57.7629	55.1472	56.891	60.8145	57.327	62.3403	#DIV/0!	#DIV/0!	#DIV/0!	78.6883	68.6616	72.5851	63.6482	56.673	67.7897	65.6099	59.5067	#DIV/0!	#DIV/0!	75.2008	64.3021	66.2639	65.392	66.4818	67.7897	66.0459	64.3021	64.3021	64.3021	63.8662	#DIV/0!	#DIV/0!	70.2395	72.6477	73.2497	75.2566	70.0388	66.8278	64.4196	65.2224	61.8107	65.2224	69.4367	#DIV/0!	#DIV/0!	87.699	63.2155
Mean_proteines_g	0.681568	0.788424	0.76532	0.730664	0.753768	0.805752	0.759544	0.825968	#DIV/0!	#DIV/0!	#DIV/0!	1.04257	0.90972	0.961704	0.843296	0.75088	0.898168	0.869288	0.788424	#DIV/0!	#DIV/0!	0.99636	0.85196	0.877952	0.8664	0.88084	0.898168	0.875064	0.85196	0.85196	0.85196	0.846184	#DIV/0!	#DIV/0!	2.982	3.08424	3.1098	3.195	2.97348	2.83716	2.73492	2.769	2.62416	2.769	2.94792	#DIV/0!	#DIV/0!	3.72324	2.6838
Mean_fibre [g]	0.25488	0.29484	0.2862	0.27324	0.28188	0.30132	0.28404	0.30888	#DIV/0!	#DIV/0!	#DIV/0!	0.38988	0.3402	0.35964	0.31536	0.2808	0.33588	0.32508	0.29484	#DIV/0!	#DIV/0!	0.3726	0.3186	0.32832	0.324	0.3294	0.33588	0.32724	0.3186	0.3186	0.3186	0.31644	#DIV/0!	#DIV/0!	0.4648	0.480736	0.48472	0.498	0.463472	0.442224	0.426288	0.4316	0.409024	0.4316	0.459488	#DIV/0!	#DIV/0!	0.580336	0.41832
%diff_in_kcal (D-N)	0.0698569	0.081948	0.1238	-0.0398926	-0.00449348	-0.0120629	-0.00326329	0.0348249	#DIV/0!	#DIV/0!	#DIV/0!	0.232687	0.0702776	0.152712	0.00602627	-0.00833221	0.224844	0.0818444	-0.0935404	#DIV/0!	#DIV/0!	0.100008	-0.0254235	-0.0318037	-0.0715011	-0.0549884	0.00175028	-0.00973755	-0.177779	-0.115702	-0.150521	-0.217086	#DIV/0!	#DIV/0!	-0.251353	-0.0720554	-0.11839	-0.0849757	-0.16619	-0.335558	-0.295139	-0.220711	-0.326459	-0.15166	-0.0424626	#DIV/0!	#DIV/0!	0.24104	-0.0626495
%diff_in_proteine_intake (D-N)	-0.804201	-0.801816	-0.793322	-0.824559	-0.818236	-0.819607	-0.818012	-0.810946	#DIV/0!	#DIV/0!	#DIV/0!	-0.769339	-0.804119	-0.78723	-0.816314	-0.818932	-0.771165	-0.801836	-0.833733	#DIV/0!	#DIV/0!	-0.798197	-0.822001	-0.823133	-0.830022	-0.827189	-0.817098	-0.819187	-0.847227	-0.837387	-0.842976	-0.853173	#DIV/0!	#DIV/0!	-0.545588	-0.455642	-0.480344	-0.46264	-0.504721	-0.583064	-0.565418	-0.531244	-0.579145	-0.497426	-0.439278	#DIV/0!	#DIV/0!	-0.254607	-0.450491
%diff_in_fiber_intake (D-N)	-0.537682	-0.53205	-0.511994	-0.58575	-0.570821	-0.574057	-0.570293	-0.553609	#DIV/0!	#DIV/0!	#DIV/0!	-0.455367	-0.537487	-0.49761	-0.566282	-0.572465	-0.459678	-0.532098	-0.607413	#DIV/0!	#DIV/0!	-0.523504	-0.579711	-0.582384	-0.598649	-0.59196	-0.568133	-0.573066	-0.639274	-0.616041	-0.629238	-0.653313	#DIV/0!	#DIV/0!	-0.552789	-0.464268	-0.488579	-0.471156	-0.51257	-0.589671	-0.572305	-0.538673	-0.585814	-0.50539	-0.448164	#DIV/0!	#DIV/0!	-0.266419	-0.4592
Metabolizable energy:																				Fat: 1 gram = 9 calories
N: 3.0592734 kcal/g																				Protein: 1 gram = 4 calories
F2(Altronim): 5,017105 kcal/g																				Carbohydrates: 1 gram = 4 calories															Mean_cal_diff:		#DIV/0!
																				Alcohol: 1 gram = 7 calories
																				http://www.nutristrategy.com/nutrition/calories.htm
NORM
Min_Protein(g)		0.074145	0.0886464	0.0991728	0.108	0.115186	0.119851	0.124733	0.127757	0.128909	0.130046	0.131789	0.141682	0.147528	0.150106	0.152698	0.151704	0.153029	0.156614	0.158774	0.160315	0.162144	0.164434	0.166162	0.168089	0.169576	0.171219	0.171563	0.174115	0.173307	0.170133
Max_Protein(g)		0.473704	0.566352	0.633604	0.69	0.735908	0.765716	0.796904	0.816224	0.823584	0.830852	0.841984	0.905188	0.94254	0.959008	0.975568	0.96922	0.977684	1.00059	1.01439	1.02424	1.03592	1.05055	1.06159	1.0739	1.0834	1.0939	1.0961	1.1124	1.10724	1.08696
DIET
Min_Protein(g)		0.0672624	0.0697824	0.0787968	0.0799056	0.0818784	0.0836352	0.0863136	0.0882144	0.0886176	0.0898272	0.0909216	0.0942768	0.0969696	0.0988272	0.100512	0.0998208	0.100843	0.101779	0.105437	0.109037	0.114264	0.120197	0.126749	0.138672	0.145742	0.15251	0.157507	0.160906	0.16069	0.161107
Max_Protein(g)		0.429732	0.445832	0.503424	0.510508	0.523112	0.534336	0.551448	0.563592	0.566168	0.573896	0.580888	0.602324	0.619528	0.631396	0.64216	0.637744	0.644276	0.650256	0.673624	0.696624	0.73002	0.767924	0.809784	0.88596	0.931132	0.974372	1.0063	1.02801	1.02663	1.0293
Mean	9.44	10.92	10.6	10.12	10.44	11.16	10.52	11.44				14.44	12.6	13.32	11.68	10.4	12.44	12.04	10.92			13.8	11.8	12.16	12	12.2	12.44	12.12	11.8	11.8	11.8	11.72			14	14.48	14.6	15	13.96	13.32	12.84	13	12.32	13	13.84			17.48	12.6
SD	1.82757	1.73013	1.84842	1.30128	1.82757	1.17898	1.29486	2.00167				2.00167	1.84842	1.77294	1.14455	1.38444	2.00167	1.51327	1.11505			1.25831	1.25831	1.51877	1.08012	1.32288	2.00167	1.42361	1.25831	1.58114	1.29099	1.51438			2.10159	1.78232	1.11803	1.55456	1.33791	0.988264	1.02794	2.10159	0.988264	1.55456	1.02794			1.78232	1.11803
CV	0.193598	0.158436	0.17438	0.128585	0.175054	0.105644	0.123086	0.174971				0.13862	0.1467	0.133104	0.0979925	0.133119	0.160906	0.125687	0.102111			0.0911816	0.106636	0.124899	0.0900103	0.108432	0.160906	0.11746	0.106636	0.133995	0.109406	0.129213			0.150113	0.123088	0.0765777	0.103638	0.0958387	0.074194	0.0800579	0.161661	0.0802163	0.119582	0.0742733			0.101963	0.0887329
Mean_kcal	51.4417	59.5067	57.7629	55.1472	56.891	60.8145	57.327	62.3403				78.6883	68.6616	72.5851	63.6482	56.673	67.7897	65.6099	59.5067			75.2008	64.3021	66.2639	65.392	66.4818	67.7897	66.0459	64.3021	64.3021	64.3021	63.8662			70.2395	72.6477	73.2497	75.2566	70.0388	66.8278	64.4196	65.2224	61.8107	65.2224	69.4367			87.699	63.2155
Mean_proteines_g	0.681568	0.788424	0.76532	0.730664	0.753768	0.805752	0.759544	0.825968				1.04257	0.90972	0.961704	0.843296	0.75088	0.898168	0.869288	0.788424			0.99636	0.85196	0.877952	0.8664	0.88084	0.898168	0.875064	0.85196	0.85196	0.85196	0.846184			2.982	3.08424	3.1098	3.195	2.97348	2.83716	2.73492	2.769	2.62416	2.769	2.94792			3.72324	2.6838
Mean_fibre [g]	0.25488	0.29484	0.2862	0.27324	0.28188	0.30132	0.28404	0.30888				0.38988	0.3402	0.35964	0.31536	0.2808	0.33588	0.32508	0.29484			0.3726	0.3186	0.32832	0.324	0.3294	0.33588	0.32724	0.3186	0.3186	0.3186	0.31644			0.4648	0.480736	0.48472	0.498	0.463472	0.442224	0.426288	0.4316	0.409024	0.4316	0.459488			0.580336	0.41832
%diff_in_kcal (D-N)	0.0698569	0.081948	0.1238	-0.0398926	-0.00449348	-0.0120629	-0.00326329	0.0348249				0.232687	0.0702776	0.152712	0.00602627	-0.00833221	0.224844	0.0818444	-0.0935404			0.100008	-0.0254235	-0.0318037	-0.0715011	-0.0549884	0.00175028	-0.00973755	-0.177779	-0.115702	-0.150521	-0.217086			-0.251353	-0.0720554	-0.11839	-0.0849757	-0.16619	-0.335558	-0.295139	-0.220711	-0.326459	-0.15166	-0.0424626			0.24104	-0.0626495
%diff_in_proteine_intake (D-N)	-0.804201	-0.801816	-0.793322	-0.824559	-0.818236	-0.819607	-0.818012	-0.810946				-0.769339	-0.804119	-0.78723	-0.816314	-0.818932	-0.771165	-0.801836	-0.833733			-0.798197	-0.822001	-0.823133	-0.830022	-0.827189	-0.817098	-0.819187	-0.847227	-0.837387	-0.842976	-0.853173			-0.545588	-0.455642	-0.480344	-0.46264	-0.504721	-0.583064	-0.565418	-0.531244	-0.579145	-0.497426	-0.439278			-0.254607	-0.450491
%diff_in_fiber_intake (D-N)	-0.537682	-0.53205	-0.511994	-0.58575	-0.570821	-0.574057	-0.570293	-0.553609				-0.455367	-0.537487	-0.49761	-0.566282	-0.572465	-0.459678	-0.532098	-0.607413			-0.523504	-0.579711	-0.582384	-0.598649	-0.59196	-0.568133	-0.573066	-0.639274	-0.616041	-0.629238	-0.653313			-0.552789	-0.464268	-0.488579	-0.471156	-0.51257	-0.589671	-0.572305	-0.538673	-0.585814	-0.50539	-0.448164			-0.266419	-0.4592
Mean DIFFERENCE before diet change and after
	BEFORE	AFTER		%difference
Calories	51.4417	68.9637		0.340619
Protein	0.681568	2.92784		3.29574
Fiber	0.25488	0.456358		0.790481
Mean DIFFERENCE between groups before diet change and after
	BEFORE	AFTER
Calories	0.0698569	-0.140768
Protein	-0.804201	-0.486559
Fiber	-0.537682	-0.494695
[truncated: 5 more columns]

## Sheet: Ketones
NORMA
OZN	6.12	13.12	20.12	27.12	3.01	10.01	17.01	24.01	21.02	7.03	21.03	4.04	11.04	2.05	16.05	30.05	13.06	28.06	10.07	11.08	26.08	5.09	20.09	3.10	30.10
TYDZIEŃ	1	2	3	4	5	6	7	8	12	14	16	18	19	22	24	26	28	30	32	36	38	40	42	44	48		Mean_ALL	SD_All	CV_All		Slope	CutOff
1	0.1	0.1	0.1	0.1	0	0.1	0.1	0.2	0.2	0.2	0.2	0.2	0.1	0.1	0.1	0.1	0.1	0.1	0.1	0.2	0.1	0.2	0.1	0.1	0.1		0.124	0.0522813	0.421623		0.000247713	0.118798
2	0.2	0.1	0.1	0.1	0	0.1	0.1	0.1	0.2	0.1	0.2	0.2	0.2	0.1	0.1	0.1	0.2	0.1	0.1	0.2	0.1	0.1	0.1	0	0.2		0.124	0.0597216	0.481626		5.71646e-05	0.1228
3	0.2	0.1	0.1	0.1	0.1	0.1	0.1	0.1	0	0	0.2	0.2	0.1	0.2	0.1	0.2	0.2	0.2	0.2	0.2	0.2	0.3	0.1	0	0.2		0.14	0.0763763	0.545545		0.00181021	0.101986
4	0.2	0.2	0.1	0.1	0	0.1	0.1	0.1	0.1	0.2	0.1	0	0.1	0.2	0.1	0.2	0.2	0.2	0.2	0	0.2	0	0.2	0	0.1		0.12	0.0763763	0.636469		-0.000247713	0.125202
5	0.1	0.2	0.1	0.1	0.1	0.2	0.1	0.1	0.1	0.1	0.2	0.1	0.1	0.2	0.1	0	0	0	0.2	-	-	-	-	-	-		0.110526	0.0657836	0.595185		-0.00185958	0.137637
6	0.1	0.1	0.1	0.1	0.1	0.2	0.2	0.1	0.2	0.2	0.2	0	0.1	0.2	0.2	0.1	0.1	0.1	0.2	0	0.2	0	0.1	0.2	0.1		0.128	0.0678233	0.52987		-0.000495427	0.138404
7	0.2	0.2	0.2	0.2	0.1	0.2	0.2	0.2	0.2	0.2	0.2	0.1	0.1	0	0.1	0.1	0.2	0.1	0	0.1	0.2	0.2	0.1	0.3	0.1		0.152	0.0714143	0.469831		-0.00114329	0.176009
8	0.2	0.2	0.1	0.1	0	0.1	0.1	0.2	0.2	0	0.1	0.2	0.1	0.2	0.2	0.1	0.1	0.1	0.2	0.2	0.2	0.2	0.1	0.2	0.2		0.144	0.0650641	0.451834		0.00142912	0.113989
9		0.2	0.1	0.1	0.1	0.2	0.2	0.2	0.2	0.2	0.3	0.2	0	0.1	0.2	0.2	0.2	0.2	0.1	0.2	0.2	0	0.2	0	0.1		0.154167	0.0779028	0.505315		-0.00132124	0.183014
10		0.2	0.3	0.2	0.2	0.1	0.2	0.2	0.2	0.3	0.3	0.2	0	0.2	0.3	0.2	0.2	0.2	0.2	0.2	0.2	0.2	0.2	0.1	0.1		0.195833	0.0690253	0.35247		-0.00118325	0.221668
11		0.1	0.1	0.1	0.2	0.1	0.2	0.1	0.2	0.2	0.1	0	0.1	0.1	0.2	0.2	0.2	0.2	0.1	0	0.1	0.3	0.2	0.2	0.2		0.145833	0.072106	0.494441		0.00136263	0.116083
12		0.2	0.3	0.1	0	0.1	0	0.1	0	0.1	0.2	0.1	0.2	0.1	0.2	0.2	0.1	0.2	0.1	-	-	-	-	-	-		0.127778	0.0826442	0.646781		0.00131682	0.107586
13		0.1	0.1	0.1	0	0.1	0.1	0.1	0.1	0.2	0.2	0.1	0.2	0.1	0.2	0.1	0.1	0.1	0.1	0.1	0.3	0.1	0.1	0.1	0		0.116667	0.0637022	0.546019		0.000179385	0.11275
14		0.3	0.2	0.2	0.2	0.2	0.1	0.1	0.2	0.2	0.1	0.1	0.1	0.3	0.4	0.3	0.1	0.3	0.3	0.1	0.2	0.3	0.3	0.2	0.1		0.204167	0.0907896	0.444684		0.000831379	0.186015
15		0.4	0.1	0.1	0.1	0.2	0.1	0.2	0.2	0.1	0.2	0	0	0	0.2	0.2	0.1	0.2	0	0	0.2	0.1	0.1	0.2	0.1		0.129167	0.0954585	0.739033		-0.00144543	0.160725
16		0.2	0.2	0.1	0	0	0	0	0.1	0.3	0.3	0	0.1	0.1	0.2	0.1	0	0.1	0.1	0	0.2	0	0	0.2	0.2		0.104167	0.0999094	0.95913		0.000148337	0.100928
17		0.1	0.1	0.1	0.1	0	0	0.1	0.1	0	0.1	0.3	0.2	0.1	0.1	0.1	0.1	0.1	0.1	0.3	0.2	0	0	0.2	0.2		0.1125	0.0850192	0.755726		0.0017076	0.0752173
18		0.1	0.1	0	0.1	0.1	0	0.1	0.1	0	0.2	0.1	0.1	0.2	0.3	0.2	0.1	0.2	0.2	0.1	0.3	0.2	0	0.2	0.2		0.133333	0.0868115	0.651086		0.00290465	0.0699151
19		0.2	0.1	0.1	0	0	0.1	0.1	0.2	0.2	0.2	0.2	0.2	0.1	0.3	0.2	0.2	0.2	0.1	0.2	0.3	0.1	0.2	0.3	0.2		0.166667	0.0816497	0.489898		0.00295295	0.102194
20		0.1	0.2	0.2	0.1	0.2	0.1	0.1	0	0	0.3	0.1	0.1	0.1	0.2	0.2	0.3	0.2	0.1	0.1	0.1	0.1	0.2	0.1	0.1		0.1375	0.076967	0.55976		1.03491e-05	0.137274
21		0.1	0.1	0.1	0	0	0.1	0.2	0	0.2	0.1	0.2	0.1	0.1	0.1	0.1	0.1	0.1	0.1	0.2	0.2	0.1	0.1	0	0.1		0.104167	0.0624094	0.59913		0.000520905	0.0927936
22		0.1	0.2	0.1	0.1	0.1	0.2	0.1	0.1	0.2	0.1	0.2	0.2	0.2	0.1	0.2	0.1	0.2	0.2	0.2	0.4	0.3	0.2	0.1	0.2		0.170833	0.0750604	0.439378		0.00248034	0.116679
23		0.2	0.1	0.2	0.1	0.2	0.1	0.1	0.1	0.1	0.1	0.2	0.2	0.2	0.3	0.2	0.2	0.2	0.2	0.2	0.2	0.1	0.2	0.1	0.1		0.1625	0.0575779	0.354326		0.000486408	0.15188
24		0.2	0.3	0.2	0.1	0.2	0.1	0.1	0.2	0.1	0.1	0.2	0.1	0.1	0.1	0.1	0.1	0.1	0.1	0.2	0.3	0.2	0.1	0.1	-		0.147826	0.0665348	0.450088		-0.00067168	0.161727
25		0.2	0.3	0.2	0	0.1	0.2	0.1	0.1	0.1	0.1	0.2	0.1	0.1	0.1	0.2	0.2	0.2	0.1	0.2	0.2	0	0.2	0.2	0.1		0.145833	0.072106	0.494441		-8.62426e-05	0.147716
Mean		0.168	0.152	0.124	0.072	0.12	0.112	0.124	0.132	0.14	0.176	0.136	0.116	0.136	0.18	0.156	0.14	0.156	0.136	0.13913	0.208696	0.134783	0.134783	0.134783	0.136364		0.140059	0.0740206	0.544547		0.000399685	0.13116
SD	REZONANS	0.0748331	0.0770281	0.0522813	0.0678233	0.0707107	0.0665833	0.0522813	0.0748331	0.0912871	0.0723418	0.0860233	0.06245	0.07	0.0866025	0.0650641	0.0707107	0.0650641	0.07	0.0891328	0.0733178	0.107063	0.0775107	0.0934622	0.0581087		0.0258228	0.011787	0.134842		0.00134203	0.0361628
DIETA
OZN	6.12	13.12	20.12	27.12	3.01	10.01	17.01	24.01	21.02	7.03	21.03	4.04	11.04	2.05	16.05	30.05	13.06	28.06	10.07	11.08	26.08	5.09	20.09	3.10	30.10
TYDZIEŃ	1	2	3	4	5	6	7	8	12	14	16	18	19	22	24	26	28	30	32	36	38	40	42	44	48		0.26	0.11547	0.444116		0.00339177	0.188773
1	0.3	0.2	0.1	0.2	0.2	0.3	0	0.1	0.2	0.1	0.4	0.3	0.3	0.3	0.5	0.3	0.3	0.3	0.4	0.2	0.3	0.4	0.2	0.2	0.4		0.168	0.0748331	0.445435		0.00154345	0.135588
2	0.1	0.2	0.1	0.1	0.1	0.2	0	0.2	0.3	0.2	0.2	0.2	0.2	0.2	0.1	0.1	0.1	0.2	0.2	0.1	0.3	0.2	0.2	0.1	0.3		0.156	0.0583095	0.373779		0.00154345	0.123588
3	0.2	0.1	0.1	0.1	0	0.2	0.1	0.1	0.2	0.1	0.2	0.2	0.2	0.2	0.2	0.1	0.1	0.2	0.2	0.2	0.2	0.2	0.2	0.2	0.1		0.196	0.0978093	0.499027		0.00207698	0.152383
4	0.3	0.2	0.1	0.1	0.1	0.1	0.1	0.1	0.2	0.4	0.3	0.2	0.2	0.1	0.1	0.2	0.3	0.2	0.1	0.3	0.2	0.1	0.3	0.4	0.2		0.224	0.116476	0.519982		0.00331555	0.154373
5	0.2	0.1	0.2	0.1	0	0.3	0.2	0.2	0.2	0.4	0.2	0.2	0.2	0.2	0.1	0.2	0.4	0.2	0.2	0.4	0.1	0.2	0.4	0.5	0.2		0.224	0.12	0.535714		-0.000609756	0.236805
6	0.1	0.2	0.2	0.2	0.3	0.1	0.6	0.3	0.2	0.5	0.1	0.1	0.2	0.2	0.2	0.1	0.2	0.3	0.1	0.2	0.3	0.2	0.3	0.2	0.2		0.232	0.131403	0.566391		0.000304878	0.225598
7	0.2	0.1	0.2	0.3	0.2	0.4	0.2	0.1	0.2	0.2	0.2	0.1	0.2	0.4	0.7	0.1	0.2	0.4	0.2	0.2	0.2	0.2	0.3	0.1	0.2		0.336	0.542279	1.61393		-0.00192454	0.376415
8	0.1	0.1	0.1	0.2	0.1	0.2	0.2	0.2	2.9	0.4	0.3	0.2	0.2	0.3	0.3	0.3	0.4	0.1	0.2	0.2	0.4	0.3	0.3	0.2	0.2		0.232	0.1249	0.538362		0.00360137	0.156371
9	0.2	0.1	0.2	0.1	0.1	0.1	0.3	0.3	0.3	0.5	0.3	0.2	0.1	0.1	0.1	0.2	0.1	0.1	0.3	0.4	0.2	0.3	0.4	0.4	0.4		0.188	0.101325	0.53896		0.00423018	0.0991662
10	0	0.2	0	0.1	0.1	0.2	0.1	0.2	0.1	0.3	0.3	0.2	0.1	0.1	0.2	0.2	0.1	0.2	0.4	0.3	0.2	0.2	0.3	0.3	0.3		0.216	0.124766	0.577622		0.00358232	0.140771
11	0.3	0.2	0.1	0.1	0.2	0.1	0.5	0.1	0.1	0.1	0.2	0.2	0.1	0.1	0.2	0.2	0.1	0.3	0.2	0.4	0.2	0.2	0.4	0.5	0.3		0.308	0.610956	1.98362		0.00222942	0.261182
12	0.3	0.1	0.1	0.1	0.3	0.1	0.1	0.2	0.1	0.1	0.3	0.2	0.2	0.2	3.2	0.3	0.5	0.2	0.2	0.1	0.1	0.3	0.1	0.1	0.2		0.236	0.122066	0.517227		3.81098e-05	0.2352
13	0.2	0.4	0.1	0.1	0.2	0.2	0.1	0.2	0.1	0.3	0.6	0.4	0.3	0.2	0.3	0.4	0.2	0.2	0.1	0.2	0.3	0.3	0.1	0.2	0.2		0.244	0.112101	0.459431		0.000685976	0.229595
14	0.2	0.3	0.3	0.1	0.2	0.1	0.3	0.2	0.2	0.2	0.5	0.4	0.3	0.1	0.2	0.2	0.3	0.1	0.5	0.2	0.2	0.3	0.1	0.3	0.3		0.212	0.0971253	0.458138		-0.000533537	0.223204
15	0.2	0.2	0.4	0.3	0.3	0.2	0.1	0.1	0.2	0.1	0.3	0.2	0.3	0.2	0.2	0.3	0.1	0.1	0.3	0.1	0.2	0.3	0.1	0.1	0.4		0.236	0.115036	0.487442		0.00228659	0.187982
16	0.3	0.3	0.2	0.1	0.1	0.2	0.1	0.1	0.1	0.2	0.4	0.3	0.4	0.2	0.1	0.3	0.2	0.2	0.4	0.5	0.2	0.4	0.2	0.2	0.2		0.168	0.0690411	0.410959		0.000609756	0.155195
17	0.2	0.2	0.2	0.1	0	0.3	0.2	0.2	0.1	0.1	0.1	0.1	0.2	0.2	0.2	0.2	0.1	0.2	0.1	0.2	0.2	0.3	0.2	0.2	0.1		0.2	0.1	0.5		0.00230564	0.151582
18	0	0.4	0.2	0.1	0	0.2	0.2	0.2	0.2	0.1	0.2	0.1	0.1	0.2	0.3	0.3	0.2	0.3	0.3	0.3	0.3	0.2	0.3	0.1	0.2		0.22	0.0912871	0.414941		0.00442073	0.127165
19	0.1	0.2	0.1	0.1	0.1	0.2	0.3	0.2	0.2	0.2	0.3	0.2	0.1	0.2	0.1	0.2	0.2	0.2	0.3	0.3	0.3	0.3	0.4	0.3	0.4		0.156	0.0768115	0.492381		0.00234375	0.106781
20	0.1	0.1	0.1	0.1	0	0.1	0.2	0.2	0.2	0.1	0.2	0.2	0.2	0.1	0.1	0.2	0.1	0.1	0.2	0.3	0.1	0.2	0.3	0.3	0.1		0.2	0.0866025	0.433013		0.00257241	0.145979
21	0.3	0.2	0.1	0.1	0.1	0.1	0.1	0.1	0.2	0.3	0.3	0.2	0.1	0.2	0.2	0.2	0.1	0.2	0.4	0.3	0.2	0.3	0.2	0.3	0.2		0.179167	0.0977093	0.545354		0.00416379	0.0882572
22		0.1	0.1	0.1	0	0.2	0.1	0.2	0.1	0.2	0.2	0.1	0.2	0.2	0.2	0.2	0.2	0.1	0.2	0.1	0.4	0.3	0.1	0.3	0.4		0.204167	0.0907896	0.444684		0.00360494	0.125459
23		0.1	0.1	0.1	0.1	0.2	0.2	0.1	0.1	0.2	0.2	0.1	0.2	0.3	0.4	0.2	0.2	0.3	0.4	0.3	0.2	0.2	0.2	0.2	0.3		0.195833	0.0858673	0.438471		0.00233545	0.144843
24		0.3	0.2	0.1	0	0.2	0.2	0.1	0.1	0.1	0.3	0.2	0.1	0.2	0.3	0.3	0.1	0.2	0.3	0.2	0.3	0.2	0.2	0.2	0.3		0.241667	0.265259	1.09762		0.00311853	0.173579
25		0.2	0.1	0.1	0.1	0.2	0.1	0.1	0.1	0.2	0.1	0.1	0.2	0.4	1.4	0.3	0.2	0.4	0.4	0.2	0.2	0.1	0.2	0.2	0.2
																								NOWA KARMA
Mean		0.192	0.148	0.128	0.116	0.188	0.184	0.164	0.276	0.224	0.268	0.196	0.196	0.204	0.396	0.224	0.2	0.212	0.264	0.248	0.232	0.248	0.24	0.244	0.252		0.215535	0.146365	0.62052		0.00199356	0.173211
SD	REZONANS	0.0909212	0.0822598	0.0613732	0.0986577	0.0781025	0.137477	0.0637704	0.550212	0.13	0.11804	0.0840635	0.0789515	0.0840635	0.644515	0.0778888	0.111803	0.0881287	0.115036	0.104563	0.0802081	0.0770281	0.1	0.115758	0.0962635		0.042314	0.138404	0.39104		0.00169863	0.0644081
p-value		0.313289	0.859885	0.805139	0.0723166	0.00225518	0.0225636	0.0191042	0.200951	0.0110366	0.00171176	0.0161193	0.000236979	0.00316166	0.103283	0.00158009	0.0278815	0.0138079	1.86133e-05	0.000346535	0.300272	0.00010975	0.000195651	0.000831946	1.28365e-05		1.11718e-09	0.0122688	0.364008		0.000651698	0.00677189
%-diff		-0.142857	0.0263158	-0.0322581	-0.611111	-0.566667	-0.642857	-0.322581	-1.09091	-0.6	-0.522727	-0.441176	-0.689655	-0.5	-1.2	-0.435897	-0.428571	-0.358974	-0.941176	-0.7825	-0.111667	-0.84	-0.780645	-0.810323	-0.848		-0.424509	-0.656524	-0.130418		-1.33198	-0.276317
		w diecie ketogenicznej to jest 1-1,4 mmol/dm3 (Schwarzkroin; może być inny aparat, ale nasz też mierzy w mmol/dm3)
		to na pewno nie jest dieta ketogeniczna!!!

## Sheet: BodyMass
NORMA
OZN/DATA	6.12	13.12	20.12	27.12	3.01	10.01	17.01	24.01	31.01	7.02	14.02	21.02	7.03	21.03	4.04	11.04	25.04	2.05	16.05	30.05	13.06	28.06	10.07	26.07	11.08	26.08	5.09	20.09	3.10	18.10	30.10
TYDZIEŃ	1	2	3	4	5	6	7	8	9	10	11	12	14	16	18	19	21	22	24	26	28	30	32	34	36	38	40	42	44	46	48
1	204	240	278	311	326	349	355	372	375	377	378	379	408	427	431	437	434	435	444	450	458	462	471	472	474	474	475	477	477	476	476
2	181	228	260	285	303	319	330	344	346	345	354	365	385	393	405	414	409	411	416	420	429	433	435	440	445	451	456	463	466	464	460
3	185	223	258	278	296	316	333	343	345	344	340	333	386	413	419	427	421	426	438	442	445	450	456	459	463	465	469	479	485	480	477
4	177	218	254	280	301	325	334	351	356	355	354	355	384	399	408	422	416	419	427	339	450	456	459	466	474	478	482	486	490	488	480
5	180	221	248	278	293	314	327	334	339	344	351	364	387	398	409	419	418	416	426	435	438	442	446	451	-	-	-	-	-	-	-
6	185	228	263	286	295	317	323	338	341	347	357	366	389	399	400	406	403	404	407	415	417	423	431	440	450	456	457	457	458	454	450
7	185	222	258	275	295	314	330	345	347	351	363	367	398	413	418	425	422	423	435	439	441	446	455	458	463	465	468	469	470	468	470
8	152	192	231	255	274	290	304	325	328	330	334	337	380	398	401	407	403	406	412	415	417	425	436	441	450	456	457	459	459	459	451
9		237	275	304	324	354	368	377	389	387	395	401	432	458	463	469	468	472	484	486	487	493	499	505	511	516	522	526	530	521	519
10		204	246	278	310	341	353	364	377	374	390	404	437	461	468	473	469	475	481	487	490	496	503	509	519	522	533	541	549	545	541
11		150	190	216	235	255	265	272	287	287	289	292	324	340	344	347	345	351	358	465	369	375	385	388	395	397	400	401	404	402	403
12		223	260	284	305	327	336	360	372	370	376	384	410	426	433	442	441	448	469	483	492	494	499	501	-	-	-	-	-	-	-
13		151	209	248	276	295	310	313	321	323	330	335	364	376	398	406	407	413	421	424	433	428	415	412	410	407	421	433	437	433	442
14		205	244	274	299	322	339	356	368	368	369	372	402	410	419	422	418	422	436	434	431	436	441	450	459	465	467	469	472	469	454
15		133	186	222	248	273	285	298	311	310	315	325	349	363	365	369	366	368	373	380	385	390	402	403	407	408	411	415	417	421	405
16		215	252	284	317	334	347	359	366	365	370	371	395	407	415	421	418	420	432	439	444	450	459	464	470	475	482	486	489	490	470
17		197	237	267	295	308	317	323	331	335	333	339	366	364	377	389	390	398	404	409	411	422	434	444	455	465	469	471	473	475	459
18			223	245	279	291	310	321	330	341	340	343	354	374	379	384	378	381	393	402	410	414	419	423	429	432	434	444	446	442	432
19		217	270	301	328	350	360	376	390	399	393	398	418	442	452	460	456	461	475	483	488	495	503	509	515	521	529	538	544	538	514
20		217	263	288	321	338	356	365	372	380	382	386	414	439	435	442	443	452	469	465	460	470	482	489	496	504	508	513	515	509	498
21		206	255	291	321	340	355	372	383	393	390	397	411	426	437	445	443	449	463	470	473	479	487	492	498	502	505	518	523	515	497
22		199	243	281	312	338	349	364	375	382	381	389	420	432	444	451	450	453	468	472	475	480	488	492	501	508	512	519	522	520	502
23		184	251	293	328	342	361	381	396	401	403	404	434	455	461	473	471	474	485	493	498	503	509	515	524	529	538	443	550	533	515
24		210	246	275	304	319	333	346	353	365	364	365	389	411	415	419	417	418	420	429	436	437	439	444	452	455	456	462	451	-	-
25		223	256	288	315	328	343	363	374	379	380	381	403	421	428	435	429	432	440	450	456	461	466	472	479	483	488	492	497	489	482
Mean		205.958	246.24	275.48	300	319.96	332.92	346.48	354.88	358.08	361.24	366.08	393.56	409.8	416.96	424.16	421.4	425.08	435.04	441.04	445.32	450.4	456.76	461.56	466.913	471.043	475.609	476.565	483.652	481.409	472.591
SD	REZONANS	27.3631	23.2384	22.8949	23.5177	24.3678	24.5542	26.541	27.162	28.1127	27.6651	28.3136	27.5319	30.7707	30.409	31.0399	31.1876	31.5633	33.9515	36.7871	33.5071	33.5721	33.8419	34.5604	35.9329	37.1966	38.1072	37.2068	40.5738	38.324	35.3899
Min_Protein(g)		0.074145	0.0886464	0.0991728	0.108	0.115186	0.119851	0.124733	0.127757	0.128909	0.130046	0.131789	0.141682	0.147528	0.150106	0.152698	0.151704	0.153029	0.156614	0.158774	0.160315	0.162144	0.164434	0.166162	0.168089	0.169576	0.171219	0.171563	0.174115	0.173307	0.170133
Max_Protein(g)		0.473704	0.566352	0.633604	0.69	0.735908	0.765716	0.796904	0.816224	0.823584	0.830852	0.841984	0.905188	0.94254	0.959008	0.975568	0.96922	0.977684	1.00059	1.01439	1.02424	1.03592	1.05055	1.06159	1.0739	1.0834	1.0939	1.0961	1.1124	1.10724	1.08696
DIETA
OZN/DATA	6.12	13.12	20.12	27.12	3.01	10.01	17.01	24.01	31.01	7.02	14.02	21.02	7.03	21.03	4.04	11.04	25.04	2.05	16.05	30.05	13.06	28.06	10.07	26.07	11.08	26.08	5.09	20.09	3.10	18.10	30.10
TYDZIEŃ	1	2	3	4	5	6	7	8	9	10	11	12	14	16	18	19	21	22	24	26	28	30	32	34	36	38	40	42	44	46	48
1	164	175	187	202	209	211	224	237	236	232	241	246	246	247	248	247	250	252	252	258	261	276	291	333	351	368	380	395	404	402	408
2	161	166	175	198	201	203	211	223	223	222	226	231	242	246	248	250	247	248	248	266	280	295	311	329	352	363	375	391	399	401	408
3	131	137	145	154	164	170	177	190	194	194	198	203	208	223	226	230	228	231	233	249	261	283	294	316	339	356	366	378	386	388	402
4	187	196	210	229	232	247	258	261	266	264	274	281	290	300	309	315	309	320	312	319	330	343	355	375	400	424	434	445	452	449	459
5	185	191	202	211	214	214	220	235	235	234	235	237	242	263	262	265	260	261	263	270	274	289	309	356	401	420	438	456	470	470	472
6	167	173	177	201	201	203	203	212	214	215	217	218	225	228	233	236	232	234	237	239	241	263	288	319	360	382	402	420	435	435	442
7	189	205	226	242	242	242	258	266	268	266	277	283	287	292	301	303	297	300	305	315	321	326	339	351	394	413	423	435	443	445	451
8	201	209	221	241	245	253	262	271	270	269	270	271	290	291	302	306	301	306	308	328	345	352	366	379	410	430	447	463	478	476	477
9	191	201	223	238	241	259	258	259	276	279	291	296	306	303	307	315	314	321	328	341	352	357	364	381	423	445	456	468	473	471	480
10	180	184	193	208	210	211	215	221	231	230	235	238	244	251	255	256	249	253	255	267	274	291	309	341	363	383	399	414	422	424	426
11	176	188	199	222	225	237	235	247	262	264	269	274	278	292	296	300	299	302	304	317	327	338	345	371	398	413	423	435	443	444	448
12	208	216	234	255	268	273	282	282	290	293	299	305	320	312	319	329	323	323	325	330	350	367	381	412	447	460	476	492	507	505	508
13	197	202	203	220	223	233	233	246	252	250	251	254	262	275	282	289	287	290	293	309	322	334	350	382	396	417	434	452	467	469	472
14	158	195	200	228	236	245	247	256	261	265	267	266	285	300	302	303	303	306	310	319	325	339	349	356	377	395	503	471	429	427	421
15	172	168	177	289	196	208	215	219	227	230	230	233	249	259	265	273	274	280	282	294	309	318	340	348	377	387	401	419	430	421	419
16	157	175	187	202	209	213	215	220	229	231	230	233	251	254	257	262	262	263	268	273	289	301	309	322	354	367	380	402	412	413	408
17	157	176	186	203	208	212	217	223	231	235	236	238	243	254	260	265	265	266	269	279	285	296	314	320	392	420	447	469	486	485	481
18	217	223	133	257	271	275	284	285	286	285	285	286	296	302	305	308	307	310	312	322	329	353	371	383	424	455	479	503	521	519	517
19	175	181	190	206	220	222	225	236	239	241	242	243	250	265	271	276	277	281	285	291	302	325	349	357	390	412	432	452	468	469	466
20	198	195	211	227	235	241	244	248	253	255	257	261	272	275	282	289	286	289	290	300	314	319	341	354	400	420	439	458	472	472	471
21	166	177	183	195	207	217	222	232	238	242	245	249	260	269	277	286	288	289	293	302	317	340	352	359	392	417	429	441	448	451	447
22	183	186	197	216	229	234	236	242	246	249	252	250	262	272	279	283	282	283	286	289	295	309	333	348	386	404	416	426	434	431	435
23		190	202	217	230	228	230	239	243	246	248	251	258	261	265	271	273	276	288	297	303	321	339	345	371	395	407	421	429	430	424
24		177	183	201	211	211	216	219	224	227	225	228	236	245	251	257	256	257	260	273	282	301	317	328	359	381	395	405	420	418	410
25		185	202	210	222	224	221	225	232	236	238	239	245	255	261	266	263	262	262	275	284	299	331	337	374	394	410	427	446	444	436
																								NOWA KARMA
Mean		186.84	193.84	218.88	221.96	227.44	232.32	239.76	245.04	246.16	249.52	252.56	261.88	269.36	274.52	279.2	277.28	280.12	282.72	292.88	302.88	317.4	333.88	352.08	385.2	404.84	423.64	437.52	446.96	446.36	447.52
SD	REZONANS	17.9784	22.8795	26.173	22.7385	23.8923	24.7163	22.804	23.1111	23.097	24.5529	25.0285	26.5978	24.3308	25.3576	26.3043	25.8433	26.8535	26.9359	27.3135	29.4722	27.5681	25.7364	24.3532	25.9695	27.7364	33.8044	31.4644	32.9083	32.5805	32.1353
p-value		0.297293	0.000472029	0.000636506	6.74496e-06	5.90525e-07	1.79856e-07	9.01751e-08	7.41379e-08	5.74903e-08	7.42496e-08	6.86657e-08	6.16764e-09	2.63408e-09	2.5017e-09	2.5002e-09	2.18186e-09	2.43971e-09	1.166e-09	4.51372e-09	1.31679e-08	8.25149e-08	6.35838e-07	8.52018e-06	0.00218327	0.0196141	0.105232	0.305618	0.380087	0.441644	0.744238
%-diff		0.0486721	0.119069	0.114491	0.149513	0.169017	0.177977	0.182041	0.183091	0.185224	0.18292	0.183499	0.200903	0.206785	0.205993	0.206096	0.206275	0.205559	0.212216	0.201875	0.190377	0.173222	0.155418	0.134556	0.0958946	0.0755848	0.0577912	0.0427151	0.039428	0.0377778	0.0272477
Min_Protein(g)		0.0672624	0.0697824	0.0787968	0.0799056	0.0818784	0.0836352	0.0863136	0.0882144	0.0886176	0.0898272	0.0909216	0.0942768	0.0969696	0.0988272	0.100512	0.0998208	0.100843	0.101779	0.105437	0.109037	0.114264	0.120197	0.126749	0.138672	0.145742	0.15251	0.157507	0.160906	0.16069	0.161107
Max_Protein(g)		0.429732	0.445832	0.503424	0.510508	0.523112	0.534336	0.551448	0.563592	0.566168	0.573896	0.580888	0.602324	0.619528	0.631396	0.64216	0.637744	0.644276	0.650256	0.673624	0.696624	0.73002	0.767924	0.809784	0.88596	0.931132	0.974372	1.0063	1.02801	1.02663	1.0293

## Sheet: PostMortem
Subject	Date	BodyMass	BrainMass	EpidymalFatMass	UWAGI
N1	16.11.2013	478	1.78
N2		454	1.9
N3		475	1.88
N4		485	1.96
N5	-	-	-	-
N6	16.11.2013	439	1.93
N7		458	1.82
N8		451	1.72
N9		527	1.89
N10		527	1.85
N11		405	1.79
N12	-	-	-	-
N13	23.11.2013	444	1.73	7.7
N14		465	1.8	5.7
N15		401	1.59	5.46
N16		477	1.77	9.72
N17		456	1.84	10.19
N18		441	1.62	9.92
N19	30.11.2013	521	1.8	9.89							Mean	SD		ttest
N20	23.11.2013	526	1.82	9.47							8.92167	1.77824		2.54807e-05
N21		515	1.61	9.92
N22	30.11.2013	515	1.7	8.22							12.836	3.38418
N23	23.11.2013	501	1.73	10
N24	-	-	-	-
N25	30.11.2013	490	1.75	10.87							%dif
D1	23.11.2013	419	1.69	6.12							0.438745
D2		421	1.61	6.14
D3		397	1.67	7.31
D4		458	1.67	13.1
D5		496	1.54	9.95
D6		450	1.69	10.2
D7		465	1.74	14.4
D8		483	1.75	15.5
D9	30.11.2013	498	1.63	13.8
D10		445	1.57	12.83
D11		460	1.67	13.09
D12		540	1.7	17.2
D13		501	1.66	18.51
D14		451	1.69	10
D15		447	1.88	11.84	perfuzja
D16		445	1.65	12.97
D17		523	1.83	17.71
D18		555	1.82	15.89
D19		504	1.94	13.96
D20		503	1.71	14.75
D21		477	1.66	15.92
D22		466	1.81	16.3
D23		461	1.6	11.27
D24		453	1.71	11.05
D25		475	1.67	11.09
