# Supplementary material for: Does Long-Term High Fat Diet Always Lead to Smaller Hippocampi Volumes, Metabolite Concentrations, and Worse Learning and Memory? A Magnetic Resonance and Behavioral Study in Wistar Rats
Source: PLoS One. 2015 Oct 8;10(10):e0139987. doi: 10.1371/journal.pone.0139987 (PMC4598109; doi:10.1371/journal.pone.0139987)
Supplement: S3 Table — (XLSX) [file pone.0139987.s003.xlsx]

## Sheet: Spectroscopy at 12th month
	Absolute	Ala	Ala_SD[%]	Asp	Asp_SD[%]	Cr	Cr_SD[%]	PCr	PCr_SD[%]	GABA	GABA_SD[%]	Glc	Glc_SD[%]	Gln	Gln_SD[%]	Glu	Glu_SD[%]	GPC	GPC_SD[%]	PCh	PCh_SD[%]	GSH	GSH_SD[%]	Ins	Ins_SD[%]	Lac	Lac_SD[%]	NAA	NAA_SD[%]	NAAG	NAAG_SD[%]	Scyllo	Scyllo_SD[%]	Tau	Tau_SD[%]	#NAME?	-CrCH2_SD[%]	GPC+PCh	GPC+PCh_SD[%]	NAA+NAAG	NAA+NAAG_SD[%]	Cr+PCr	Cr+PCr_SD[%]	Glu+Gln	Glu+Gln_SD[%]	Lip13a	Lip13a_SD[%]	Lip13b	Lip13b_SD[%]
N10		237.651	19	615.051	15	867.333	7	1040	6	855.233	9	472.756	15	833.246	9	2520	3	59.429	20	350.935	4	396.217	7	1800	3	747.427	9	2400	2	332.331	12	0	999	1240	4	155.903	30	410.364	3	2730	2	1910	2	3360	3	788.296	31	0	999
N11		174.928	38	793.091	13	796.439	8	1100	7	698.221	12	581.184	13	980.557	9	2310	3	96.427	47	271.046	17	399.82	8	1620	3	122.404	59	2440	2	254.32	19	0	999	1140	4	130.279	42	367.473	3	2690	2	1900	2	3290	3	380.139	50	0	999
N13		250.952	32	1190	10	884.438	11	1250	9	1200	8	737.819	13	1190	7	2740	3	0	999	439.133	3	449.666	8	2240	3	617.428	15	2270	3	844.848	8	0	999	1480	4	91.217	74	439.133	3	3110	2	2140	2	3940	3	933.852	33	0	999
N14		145.079	40	974.035	11	921.86	8	1320	6	1110	7	564.54	14	1180	6	2900	2	43.773	82	382.43	10	421.183	7	2220	2	697.958	9	2810	2	353.458	14	7.797	135	1510	3	191.882	25	426.203	2	3170	2	2240	2	4090	3	82.232	153	0	999
N15		247.339	20	767.112	11	811.028	7	1340	5	912.907	7	521.2	13	1040	6	2680	2	58.46	51	363.745	9	396.123	6	1960	2	327.106	18	2580	2	321.107	11	0.443	999	1490	3	190.223	21	422.205	2	2900	2	2150	1	3720	3	636.05	33	0	999
N16		221.777	16	520.791	16	809.907	5	1200	4	668.066	10	615.492	10	889.817	7	2380	2	44.853	18	370.253	3	418.691	6	2040	2	204.125	40	2270	1	252.765	10	0	999	1490	3	230.451	16	415.105	2	2520	2	2010	1	3270	3	791.941	18	149.904	22
N17		143.983	25	654.277	13	898.812	4	1090	4	549.852	11	846.97	7	1070	6	2220	3	48.491	17	345.343	3	441.275	5	1970	2	157.555	26	2320	1	219.702	11	0	999	1320	3	167.142	23	393.834	2	2540	2	1990	1	3290	3	466.306	27	0	999
N18		172.091	21	860.423	10	764.275	6	1330	4	700.649	9	434.962	14	1010	6	2390	2	52.264	19	353.359	3	424.722	6	2140	2	189.559	24	2270	2	227.005	11	0	999	1560	3	323.237	12	405.622	2	2500	2	2090	1	3400	3	837.314	19	0	999
N19		95.383	69	1040	10	615.866	14	1560	7	965.576	9	386.823	22	991.247	9	2520	3	96.233	30	314.713	10	497.188	7	1880	3	520.816	14	2680	2	306.902	17	0	999	1410	4	311.313	19	410.946	3	2990	2	2170	2	3510	3	361.302	47	0	999
N1		145.431	49	627.022	21	497.966	20	1260	9	649.078	15	423.437	23	1040	10	2010	4	91.596	35	262.084	12	447.383	9	1740	4	346.337	29	1880	3	339.783	19	0	999	1300	5	212.271	35	353.68	4	2220	4	1760	3	3040	5	528.134	44	0	999
N20		186.104	32	808.54	13	874.228	11	1260	8	980.3	8	449.823	18	956.228	8	2540	3	84.578	48	337.713	13	417.012	8	1940	3	417.237	21	2630	2	431.854	13	0	999	1410	3	272.656	21	422.292	2	3060	2	2140	2	3500	3	622.075	39	0	999
N21		99.105	45	859.258	13	757.052	7	1410	5	964.168	8	213.806	38	1170	7	2700	2	42.667	53	387.925	6	403.873	7	2030	2	634.168	7	2820	1	349.855	9	0	999	1500	3	292.137	17	430.592	2	3170	1	2160	2	3870	3	672.362	19	0	999
N22		178.197	29	817.625	12	638.807	12	1260	7	640.064	12	229.958	33	852.9	9	2290	3	89.499	33	285.099	11	486.4	6	1770	3	508.865	15	2230	2	295.965	16	0	999	1440	3	237.82	21	374.599	3	2530	2	1900	2	3140	3	763.89	32	0	999
N23		194.697	21	704.18	13	786.443	6	1130	5	555.177	12	774.622	9	966.285	7	2310	3	46.328	25	324.891	4	382.497	7	1860	3	218.766	20	1930	2	376.863	7	1.099	938	1390	3	298.834	15	371.219	2	2300	2	1910	2	3280	3	361.533	32	0	999
N25		186.191	23	910.186	11	823.859	6	1330	4	935.407	8	349.664	21	1160	6	2740	2	55.454	31	358.667	5	428.457	6	2120	2	370.923	12	2720	1	336.882	8	0	999	1580	3	246.311	18	414.121	2	3060	1	2160	1	3900	3	118.997	83	0	999
N2		241.59	32	881.585	15	827.085	13	1300	9	749.65	14	0	999	912.38	12	2370	4	76.426	33	307.287	8	448.765	10	1800	3	570.792	15	2380	3	290.899	25	0	999	1430	4	258.432	29	383.714	4	2670	3	2120	2	3280	4	370.37	60	0	999
N3		139.375	59	672.991	18	737.746	10	1140	8	687.411	14	300.522	31	928.511	11	2160	4	92.05	22	279.609	8	451.072	8	1800	3	111.722	75	2140	3	404.025	14	0	999	1380	5	50.848	131	371.659	4	2540	3	1880	2	3080	4	496.786	45	0	999
N4		228.554	30	829.671	14	844.618	10	1130	8	723.757	12	290.049	30	936.428	10	2380	4	36.379	81	329.217	9	441.237	8	1770	3	297.482	26	2190	3	353.454	15	0	999	1420	4	204.877	30	365.595	3	2550	3	1970	2	3310	4	336.157	60	0	999
N6		333.084	29	839.036	18	827.877	13	1030	11	715.978	15	310.865	34	1370	10	2380	5	101.191	34	299.502	12	407.138	13	1790	4	699.621	16	2030	4	388.1	16	0	999	1190	7	209.195	43	400.693	5	2420	3	1860	3	3750	5	0	999	98.057	64
N7		284.656	16	800.913	14	698.622	11	1240	7	758.223	12	235.137	36	959.156	9	2500	3	79.649	31	279.158	9	404.204	8	1760	3	569.36	11	2350	2	321.25	16	0	999	1290	4	174.067	33	358.806	3	2680	2	1930	2	3460	3	590.807	35	0	999
N8		219.883	23	1010	12	735.574	8	1540	5	730.725	13	530.233	16	1110	9	2530	3	56.701	82	365.879	13	560.787	6	2040	3	131.923	51	2570	2	74.023	61	0	999	1620	3	308.525	20	422.58	3	2640	2	2270	2	3650	3	1110	17	0	999
N9		173.202	36	763.426	14	725.166	10	1140	8	767.834	11	217.881	38	923.915	9	2200	3	89.174	31	308.999	9	442.85	7	1830	3	314.58	24	2040	3	355.624	15	0	999	1270	4	140.28	41	398.172	3	2400	3	1870	2	3130	4	494.522	43	0	999
D10		297.565	14	663.93	15	804.22	6	1400	4	689.305	11	852.646	8	1060	7	2670	2	51.484	29	353.789	4	413.25	7	1940	2	295.202	19	2610	2	263.295	14	0	999	1480	3	275.933	16	405.273	2	2880	2	2200	2	3730	3	1220	13	0	999
D11		129.683	52	895.757	12	884.146	9	1150	8	933.797	9	361.763	23	1030	8	2310	3	0	999	388.812	3	508.936	7	1670	3	171.456	47	2260	3	361.995	17	0	999	1320	4	87.674	65	388.812	3	2630	3	2030	2	3340	3	367.153	54	0	999
D12		138.834	46	1020	12	735.664	12	1470	7	937.215	10	412.815	23	911.042	10	2600	3	78.344	67	328.306	17	575.492	6	2210	3	587.179	17	2590	2	423.323	13	8.053	165	1480	4	324.805	19	406.65	3	3020	2	2210	2	3510	4	630.319	39	0	999
D13		177.146	33	775.896	16	1010	10	1340	8	838.542	11	855.045	10	1150	8	2940	3	0	999	425.318	3	433.371	8	2090	3	283.42	35	2950	2	271.168	19	0	999	1620	3	361.34	16	425.318	3	3220	2	2350	2	4100	3	964.29	34	0	999
D14		195.522	23	617.991	15	918.449	6	1230	5	506	14	744.854	9	1000	7	2580	3	64.927	36	295.729	9	411.873	6	2040	3	371.017	19	2460	2	283.752	13	27.319	35	1420	3	218.749	19	360.656	2	2750	2	2150	2	3580	3	829.501	32	0	999
D15		158.863	35	719.593	14	764.075	8	1260	6	755.245	10	650.934	11	1040	7	2350	3	65.445	31	285.776	8	465.906	6	2000	3	245.829	30	2090	2	428.428	11	0	999	1380	3	150.552	30	351.221	3	2520	2	2030	2	3390	3	713.301	33	0	999
D16		76.52	87	825.999	14	786.557	8	1230	7	623.43	14	309.621	28	986.133	9	2380	3	64.801	32	297.546	7	429.599	8	1810	3	59.201	126	2160	3	350.374	15	3.946	318	1310	4	29.064	196	362.347	3	2510	3	2020	2	3360	4	329.638	55	0	999
D17		91.893	57	860.351	12	962.166	7	1360	6	797.463	10	575.907	14	975.307	8	2890	2	118.851	35	297.766	15	470.667	7	2040	3	556.786	18	2830	2	293.659	16	0	999	1520	3	329.419	16	416.617	2	3120	2	2330	2	3860	3	731.94	48	45.927	127
D18		100.989	69	940.746	12	812.407	12	1050	10	859.918	10	442.743	19	862.431	10	2270	3	116.259	46	255.988	22	391.64	9	1490	3	237.798	36	2400	3	323.522	22	0	999	1110	5	138.711	48	372.247	3	2720	3	1860	2	3130	4	474.724	42	0	999
D19		72.19	86	801.469	14	1030	7	1130	8	826.506	10	680.041	12	992.426	8	2360	3	23.815	152	382.423	10	461.764	7	2010	3	107.975	62	2520	2	339.405	14	0	999	1390	4	201.18	27	406.238	3	2860	2	2160	2	3350	3	170.249	92	0	999
D1		196.719	21	752.703	12	901.185	8	1270	6	795.799	9	678.224	10	880.855	8	2580	2	69.931	44	342.249	10	438.874	6	1860	2	347.947	20	2840	2	190.814	20	2.738	322	1470	3	279.657	14	412.181	2	3030	2	2170	1	3460	3	893.464	30	0	999
D20		259.932	22	1270	11	483.759	25	1800	8	932.096	12	523.282	20	1030	9	2690	3	153.929	40	258.168	25	535.209	8	1920	3	0	999	2930	3	424.419	18	0	999	1260	5	298.69	25	412.097	3	3360	2	2280	2	3710	4	968.042	30	0	999
D21		164.07	24	783.725	12	729.117	6	1320	4	748.612	9	564.127	13	1110	7	2330	3	83.599	16	300.551	5	444.006	6	2030	2	246.182	19	2210	2	313.864	9	12.2	84	1390	3	218.529	19	384.15	2	2520	2	2050	1	3440	3	329.952	35	0	999
D22		147.006	31	684.91	14	1040	5	1020	6	680.723	10	673.964	10	896.251	8	2360	3	30.857	33	321.158	4	412.827	6	1860	3	261.552	24	2520	2	258.886	15	19.101	51	1340	3	110.666	38	352.015	3	2780	2	2060	2	3250	3	592.696	36	0	999
D23		153.683	30	619.754	15	901.162	6	1150	5	594.454	12	726.71	9	914.354	8	2380	3	47.104	20	354.956	3	436.425	6	1800	2	135.517	52	2460	2	210.672	17	0	999	1360	3	177.066	23	402.06	2	2670	2	2050	2	3300	3	1300	24	0	999
D24		140.374	55	1000	12	761.308	13	1440	8	1090	9	527.452	20	1020	9	2480	3	150.334	27	275.652	15	466.757	8	1930	3	291.557	27	2600	3	463.899	16	0	999	1230	5	192.802	35	425.986	3	3060	2	2200	2	3500	4	130.408	123	0	999
D25		185.841	27	996.354	11	863.28	11	1330	8	1070	8	1100	7	1150	7	2810	3	186.552	22	209.684	20	408.491	7	2000	3	211.786	40	2620	2	435.638	12	0	999	1460	3	314.292	16	396.235	2	3060	2	2200	2	3970	3	674.845	37	0	999
D2		203.563	27	738.05	15	871.068	8	1380	6	931.411	9	614.983	14	1030	8	2710	3	80.109	30	351.515	7	457.579	7	2090	3	277.675	48	2790	2	326.863	14	15.636	74	1450	4	244.141	21	431.624	3	3120	2	2250	2	3740	3	1010	35	0	999
D3		225.626	20	1190	9	704.45	9	1540	5	1060	8	1050	8	1120	7	3010	2	166.106	23	245.89	16	522.627	6	1970	3	202.553	30	2920	2	332.674	12	0.223	999	1380	3	237.581	21	411.997	2	3250	2	2240	2	4130	3	719.572	24	0	999
D4		186.374	27	858.958	12	681.335	13	1560	6	1050	7	810.831	9	1140	6	2630	3	104.863	31	314.765	11	512.281	6	2130	3	352.341	16	2560	2	370.914	11	0	999	1560	3	337.303	13	419.628	2	2930	2	2240	2	3770	3	478.051	39	0	999
D5		221.369	22	967.749	10	909.714	9	1350	7	1140	7	728.31	10	1240	6	2840	2	88.211	33	345.646	9	462.208	6	2080	2	528.956	13	2790	2	357.185	12	5.171	188	1470	3	256.122	18	433.857	2	3140	2	2260	2	4080	2	609.36	35	0	999
D6		200.484	21	745.631	12	894.821	8	1240	6	952.413	7	425.549	15	934.902	7	2810	2	54.712	24	379.138	4	393.406	7	1780	2	615.542	11	2720	2	314.553	12	0	999	1390	3	280.667	15	433.85	2	3040	2	2130	1	3750	3	796.192	30	0	999
D7		269.692	20	808.209	13	835.098	9	1210	7	812.765	10	782.188	11	914.491	9	2670	3	128.081	30	257.754	16	446.884	7	1950	3	555.381	13	2600	2	324.203	14	8.157	138	1260	4	220.504	24	385.836	3	2930	2	2050	2	3590	3	363.384	53	0	999
D8		255.581	19	613.212	15	828.585	8	1220	6	633.943	11	613.088	11	994.502	7	2400	3	67.297	15	300.481	4	418.733	6	1680	3	432.249	13	2350	2	314.183	12	0.53	999	1340	3	254.146	17	367.778	3	2670	2	2050	2	3400	3	371.84	48	0	999
D9		217.547	25	1040	10	747.712	11	1540	6	1080	8	480.015	16	1150	7	2820	3	90.9	20	354.86	6	389.975	8	1790	3	406.806	17	2940	2	378.453	12	0	999	1340	4	267.364	20	445.759	2	3320	2	2290	2	3970	3	644.152	38	0	999
[truncated: 93 more columns]

## Sheet: Volumes at 12th month
-	Osobnik	Include_absoluteVols	Include_relVols	agranular insular cortex, dorsal part (AID)	agranular insular cortex, posterior part (AIP)	agranular insular cortex, ventral part (AIV)	amygdalopiriform transition area (APir)	primary auditory cortex (Au1)	secondary auditory cortex, dorsal area (AuD)	secondary auditory cortex, ventral area (AuV)	cingulate cortex, area 1 (Cg1)	cingulate cortex, area 2 (Cg2)	dysgranular insular cortex (DI)	dorsal intermediate entorhinal cortex (DIEnt)	dorsolateral entorhinal cortex (DLEnt)	dorsolateral orbital cortex (DLO)	ectorhinal cortex (Ect)	frontal cortex, area 3 (Fr3)	granular insular cortex (GI)	granular insular cortex (GI)	lateral parietal association cortex (LPtA)	primary motor cortex (M1)	secondary motor cortex (M2)	medial entorhinal cortex (MEnt)	medial parietal association cortex (MPtA)	perirhinal cortex (PRh)	parietal cortex, posterior area, caudal part (PtPC)	parietal cortex, posterior area, dorsal part (PtPD)	parietal cortex, posterior area, rostral part (PtPR)	retrosplenial dysgranular cortex (RSD)	retrosplenial granular cortex, b region (RSGb)	retrosplenial granular cortex, c region (RSGc)	primary somatosensory cortex (S1)	primary somatosensory cortex, barrel field (S1BF)	primary somatosensory cortex, dysgranular zone (S1DZ)	primary somatosensory cortex, oral dysgranular zone (S1DZO)	primary somatosensory cortex, forelimb region (S1FL)	primary somatosensory cortex, hindlimb region (S1HL)	primary somatosensory cortex, jaw region (S1J)	primary somatosensory cortex, shoulder region (S1Sh)	primary somatosensory cortex, trunk region (S1Tr)	primary somatosensory cortex, upper lip region (S1ULp)	secondary somatosensory cortex (S2)	temporal associatin cortex (TeA)	primary visual cortex (V1)	primary visual cortex, binocular area (V1B)	primary visual cortex, monocular area (V1M)	secondary visual cortex, lateral area (V2L)	secondary visual cortex, mediolateral area (V2ML)
d1	d1	1	1	12.375	8.38281	3.72656	18.0156	19.0781	8.95312	4.86719	22.9453	7.84375	6.6875	7.17969	20.9766	5.89844	21.5312	8.96094	6.65625	0.492188	7.41406	37.3906	24.8516	4	2.09375	0.71875	0.046875	6.49219	1.42969	24.6875	5.07812	7.39062	2.38281	40.7188	11.9609	2.96875	16.0938	8.22656	6.08594	0.25	2.54688	19.3516	8.21875	8.29688	8.58594	23.9766	9.75	11.4531	3.875
d2	d2	1	1	12.4219	7.59375	3.95312	15.6328	16.4062	8.57812	4.41406	21.0859	7.29688	6.64844	6.35156	18.0781	5.33594	17.7578	8.40625	5.83594	0.148438	7.76562	38.0938	25.4766	3.60156	2.55469	0.890625	0.140625	5.69531	1.21875	21.2969	4.375	6.72656	1.28125	36.1328	11.4844	2.92969	16.1641	7.50781	5.92188	0.257812	3.82031	17.3047	7.49219	6.30469	8.875	20.3594	9.40625	10	4.35156
d3	d3	1	1	11.9453	8.23438	3.90625	16.9219	18.4688	9.125	5.375	19.3594	6.6875	6.49219	7.03125	22.7656	5.14062	20.4375	7.39844	6.53906	0.15625	9.13281	39.6016	26.7266	4.71094	3.21094	0.75	0.117188	5.42188	1.39062	21.6641	4.28125	6.40625	1.75781	35.9531	9.48438	2.42969	14.3906	8.28906	4.90625	0.445312	3.77344	17.2344	8.36719	6.54688	10.0312	18.4766	10.8594	10.0938	5.35938
d4	d4	1	1	13.5312	9.30469	4.04688	16.3047	19.1562	8.90625	5.20312	22.9609	7.67969	7.44531	6.73438	20.9062	5.40625	19.7969	8.5625	6.95312	0.101562	7.92188	39.3828	26.2812	3.70312	2.99219	0.726562	0.0546875	7.15625	1.40625	24.2656	4.19531	7.65625	1.75	38.5625	11.2969	2.96094	16.3438	8.34375	5.92969	0.40625	3.375	18.9766	9.13281	6.57812	8.9375	21.8672	9.85156	9.75781	5.05469
d5	d5	1	1	12.1953	8.49219	3.96875	16.6406	17.0703	8.70312	4.51562	20.2188	6.58594	6.51562	7.05469	20	5.75	18.2812	8.46094	6.42188	0.0546875	7.21875	38.0234	26.8203	4.28906	2.57812	0.796875	0.078125	5.85156	1.39844	21.1719	4.34375	7.83594	1.67188	37.8906	11.8359	2.85938	16.1875	7.75	5.96875	0.296875	3.44531	17.4688	8.03906	6.28906	8.67188	21.125	8.61719	10.0312	4.17969
d6	d6	1	0	13.1641	8.30469	4.10156	15.9297	18.875	9.20312	4.69531	21.3516	7.53906	7.03125	7.35938	19.8516	5.01562	18.4609	8.77344	7.00781	0.125	7.61719	38.5156	26.7969	3.69531	2.42188	0.523438	0.0546875	6.27344	1.27344	21.375	4.625	6.78125	1.91406	37.1797	11.6094	3.09375	15.9688	9.22656	6.04688	0.367188	2.5625	18.5859	9.20312	6.32031	9.46094	19.1562	9.03125	9.76562	4.33594
d7	d7	1	1	13.6719	9.42969	4.20312	17.7891	20.4922	9.10938	5.49219	22.0703	7.82812	7.59375	7.04688	22.4766	5.47656	21.4375	9.14844	7.00781	0.179688	8.53125	40.125	25.4141	4.1875	2.91406	0.859375	0	5.75781	1.30469	24.7266	4.89062	7.25781	2.78125	40.7109	11.8125	3.25	16.7578	8.44531	6.42969	0.34375	3.03906	20.2188	9.52344	7.39844	10.6562	21.25	9.49219	10.8672	4.86719
d8	d8	1	0	13.3828	9.64062	4.25781	16.5938	20.0547	9.46875	5.28906	19.8203	7.57812	7.5	7.08594	20.5859	6.02344	20.2812	8.49219	6.99219	0.390625	7.88281	38.2891	26.9297	3.84375	2.73438	0.914062	0.09375	6.11719	1.64062	22.4766	4.44531	7.01562	1.52344	39.9453	11	3	15.7734	7.92188	6.22656	0.265625	3.3125	19.6172	9.10156	6.89844	9.63281	21.6172	10.0312	10.2188	4.625
d9	d9	1	1	12.0625	7.875	4.35938	18.7969	18.8906	9.5625	4.94531	20.5078	7.9375	6.72656	8.71094	23.8828	4.8125	19.3828	7.92188	6.40625	0.101562	7.76562	37.0625	24.6328	4.72656	2.48438	0.632812	0.125	6.14062	1.4375	22.6797	5.27344	7.8125	1.875	39.1328	10.7109	2.66406	15.0547	8.21094	5.76562	0.28125	2.875	17.7891	8.38281	6.875	9.45312	20.8672	8.89062	10.5547	4.07031
d10	d10	1	1	12.0859	8.375	4.10156	17.2969	18.8359	9.28906	5.1875	19.9844	7.13281	7.33594	6.85156	22.3047	5.5	20.0312	8.48438	6.85156	0.226562	7.45312	36.9453	26.375	4.5	2.46875	0.820312	0.0703125	6.00781	1.53906	20.3047	4.95312	8.375	1.49219	39.7344	11.5	2.85938	15.7656	7.28125	6.27344	0.1875	3.13281	18.25	8.09375	7.03906	9.36719	20.6484	7.89062	10.7031	3.75
d11	d11	1	1	12.3516	7.97656	3.78125	14.2891	17.6016	8.73438	4.66406	20.1875	7.65625	6.82812	6.15625	19.7812	5.39844	17.9141	8.625	6.60156	0.164062	7.80469	37.5078	26.3125	3.4375	2.69531	0.914062	0	4.54688	1.3125	22.0312	5.03906	8.42969	2.27344	38.2891	11.1797	2.6875	15.3281	6.9375	5.89062	0.25	3.125	17.9219	7.85938	6.08594	10.2266	18.6562	8.57031	9.72656	4.14062
d12	d12	1	1	13.3359	9.47656	4.46094	17.7891	20.0703	9.71875	5.21875	22.5859	7.47656	7.09375	7.89844	23.2969	5.59375	19.2891	7.86719	7.125	0.4375	9.74219	40.6328	26.3984	4.32031	2.89062	1.03125	0.117188	5.70312	1.35156	21.8828	4.45312	6.64062	2.61719	39.2344	11.2188	2.91406	15.25	9.40625	5.85156	0.523438	2.99219	19.6484	9.09375	7.13281	11.4297	21.8594	9.49219	10.9297	4.875
d13	d13	1	1	13.5547	8.42188	3.95312	17	18.8828	8.82031	4.97656	23.9531	7.89844	7.74219	8.6875	22.9766	5.01562	19.9375	9.21875	6.80469	0.242188	7.96875	39.6953	27.5469	3.89062	2.75781	0.726562	0.117188	5.61719	1.16406	25.75	4.94531	7.64062	2.9375	40.5781	11.2656	2.53906	17.0703	9.35156	6.24219	0.28125	2.84375	18.3438	8.02344	6.92188	10.8906	23.2734	10.6016	11.0938	5.00781
d14	d14	1	1	12.6016	9.11719	3.88281	15.9375	18.9688	8.9375	5.14062	21.7656	7.92188	7.01562	7.00781	20.6953	4.92969	19.6484	8.74219	7.09375	0.476562	8.78125	38.0234	25.5078	3.67969	2.9375	0.820312	0.09375	4.72656	1.22656	22.5781	4.67969	7.28906	2.77344	38.6172	10.8906	2.83594	16.2031	7.77344	5.78906	0.148438	3.36719	19.0078	9.23438	7.26562	11.3594	21.0859	8.44531	10.9453	4.40625
d15	d15	1	1	12.6172	8.65625	4.28125	16.5156	17.6328	9.25	4.54688	20.9922	6.94531	7.20312	6.67969	20.8047	5.55469	17.9922	8.58594	6.54688	0.015625	7.41406	38.4688	27.6328	3.94531	2.42188	1.05469	0.015625	5.48438	1.61719	22.1328	4.72656	7.95312	2.11719	39.7266	11.5234	2.91406	15.5391	7.72656	6.03125	0.242188	2.67969	19.25	8.57812	6.625	9.51562	21.0625	8.16406	10.5312	3.92188
d16	d16	1	1	12.3906	8.64062	4.03125	15.4297	17.6094	8.64844	4.77344	21.2266	7.04688	7.46094	6.71094	19.4453	5.14062	18.5078	7.80469	6.77344	0.234375	7.5	36.6406	26.5234	3.63281	2.5	0.695312	0.0703125	4.90625	1.50781	21.2344	4.69531	7.64844	1.91406	38.1484	10.4453	2.91406	15.6484	8.1875	6.01562	0.28125	2.96875	18.4141	9.03125	6.22656	9.83594	19.2031	8.10938	10.5703	4.08594
d17	d17	1	1	12.8594	8.17969	4.11719	18.9219	20.7422	10.0859	5.57812	20.2812	6.89844	7.98438	8.57031	24.7734	4.97656	21.4453	8.94531	7.40625	0	8.1875	38.8281	26.2266	4.67188	2.34375	0.882812	0.117188	5.67188	1.3125	22	4.4375	8.04688	2.92188	41.625	11.7344	2.99219	16.7656	8.78125	6.42188	0.289062	2.73438	19.7422	8.90625	7.17188	10.1562	22.8359	9.23438	11.7188	3.89844
d18	d18	1	0	14.0156	8.75781	4.17188	18.2656	21.0703	9.71875	5.66406	21.1094	7.82812	7.72656	8.47656	24.5156	5.14844	22.8984	9.29688	7.05469	0.304688	8.16406	40.4375	25.4844	4.75781	2.47656	1	0.148438	6.16406	1.63281	23.0391	4.85938	7.60938	1.74219	42.6016	12.5938	3.49219	17.1875	8.14062	6.28906	0.1875	3.25	20.4688	8.96094	8.09375	10.0781	23.6562	10.0625	12.2734	3.8125
d19	d19	1	1	13.3438	8.47656	4.04688	18.0391	21.2344	9.66406	5.55469	20.3984	7.45312	6.71094	7.75	24.3672	5.53125	21.3906	8.48438	6.60938	0.179688	8.71875	42.1719	28.5234	4.63281	2.85156	0.851562	0.0703125	7.40625	1.42969	24.0391	4.85938	8.19531	2.02344	40.7188	11.4141	2.94531	17.0469	8.84375	5.60938	0.46875	3.30469	19.1406	8.67188	7.21875	9.83594	22.3281	10.5	11.1953	5.29688
d20	d20	1	1	13.4141	7.61719	4.17969	15.1094	19.8125	9.13281	5.38281	24.5547	8.25	7.4375	7.125	22.0312	4.33594	18.8984	7.89844	7.13281	0.15625	8.58594	39.5781	24.9375	3.67969	2.9375	0.75	0.078125	6.20312	1.60938	21.8516	5.04688	7.48438	1.55469	39.5156	10.8125	2.72656	15.6172	9.36719	5.98438	0.320312	3.5625	18.1719	8.47656	6.44531	10.2031	20.2344	10.8984	9.35938	5.1875
d21	d21	1	1	13.9219	8.07031	4.46875	15.125	18.7031	8.71875	5.17969	20.125	8.32031	7.85938	7	19.4609	4.67969	18.8828	9.02344	6.58594	0.15625	7.4375	34.5625	25.2734	4.19531	2.25781	0.648438	0.0078125	5.19531	1.1875	19.6406	5.5	7.5625	2.6875	39.9766	11.8125	2.64844	16.4688	7.57031	5.89062	0.328125	2.48438	17.7188	7.80469	6.4375	10.4844	21.7734	8.36719	10.7422	3.76562
d22	d22	1	1	13.5078	8.65625	4.34375	17.3281	20.0938	9.66406	5.19531	22.9375	8.26562	8.03125	7	20.1484	5.64844	20.8984	9.27344	7.625	0.179688	7.84375	41.4141	26.7031	4.32812	2.66406	0.914062	0.109375	6.76562	1.5625	21.6797	4.60938	7.48438	1.21875	44.0938	12.4844	3.1875	17.3203	8.14062	6.71094	0.289062	3.4375	20.4531	9.75	7.40625	9.39844	22.6172	9.24219	10.7734	4.41406
d23	d23	1	1	12.9609	8.14844	3.75781	15.8984	19.2578	8.95312	4.8125	20.0859	6.10156	6.96094	6.07812	22.2969	4.92188	17.6016	6.83594	6.70312	0.015625	11.4609	40.5	26.7266	3.9375	4.8125	0.648438	0.15625	4.92969	1	22.3828	3.72656	6.35156	1.63281	35.375	9.10156	2.53125	14.2891	9.625	5.20312	0.382812	4.24219	17.75	8.60938	6.28125	10.9375	16.4922	10.4609	9.40625	8.28125
d25	d25	1	1	13.0391	8.39062	4.07812	16.6016	18.8672	9.09375	4.88281	20.1797	7.375	7.78125	7.125	21.2031	5.55469	18.7266	8.80469	7.21094	0.28125	7.91406	38.4922	28.25	4.11719	2.57812	0.78125	0.0859375	5.71094	1.33594	21.2188	4.53125	6.76562	1.48438	39.0469	11.5547	2.86719	16.0703	8.60156	6.13281	0.28125	2.89844	18.9062	9.15625	6.55469	9.83594	20.3281	7.96094	9.95312	3.78906
n1	n1	1	1	13.6172	8.5625	4.44531	17.2656	18.9375	9.24219	5.07812	22.625	6.61719	7.44531	7.41406	21.6016	5.85938	19.9531	8.53906	7.00781	0.125	8.76562	39.5	28	3.72656	2.71094	0.929688	0.101562	6.52344	1.5625	22.7344	4.70312	6.72656	1.36719	40.2891	11.9922	2.99219	17.1641	8.9375	6.4375	0.257812	3.52344	19.7188	8.25781	6.27344	9.35156	19.75	9.5625	9.03125	4.67188
n2	n2	1	1	12.8906	8.58594	4	15.2734	18.3281	9.00781	4.85156	21.9297	8.28906	7.11719	6.28906	20.0547	4.96875	18.4141	8.44531	6.90625	0.257812	8.6875	40.3906	27.4609	3.82031	2.70312	0.90625	0.0625	5.99219	1.21875	20.9219	4.35156	6.19531	1.8125	38.1875	11.2344	2.83594	16.2344	9.01562	5.69531	0.304688	3	18.9609	8.60938	6.70312	10.1875	21.4062	8.53906	10.125	4.20312
n3	n3	1	1	13.3594	9.09375	4.46875	17.8906	20.7188	9.48438	5.57031	23.0781	8.04688	7.85156	8.21094	22.75	5.5	20.2578	8.67188	7.28906	0.09375	8.67969	39.0859	27.0625	4.22656	2.82031	0.90625	0.0390625	5.16406	1.3125	23.1875	4.61719	7.67969	2.44531	40.6875	11.5938	3.17969	15.8125	8.75781	6.44531	0.195312	3.20312	20.4844	9.40625	7.33594	10.5156	21.2812	8.96875	11.25	4.32812
n4	n4	1	1	13.4609	9.89062	4.38281	17.3438	19.3125	9.26562	5.21094	21.8047	8	7.70312	7.49219	21.2266	4.58594	20.3047	8.46094	7.03906	0.296875	8.89062	41.3594	26.5391	3.80469	3.05469	0.8125	0.125	6.38281	1.39844	24.1484	4.375	6.99219	1.80469	37.7109	11.3984	2.91406	16.1875	8.91406	5.78125	0.226562	3.57812	18.6719	8.8125	6.13281	10.0859	20.375	9.59375	9.6875	5.59375
n6	n6	1	1	12.6328	8.51562	4.29688	17.8203	17.8828	7.79688	4.96094	23.5078	8.17188	6.16406	7.67969	22.375	5.47656	17.5156	8.53906	6.36719	0.289062	7.64062	39.9141	27.0625	3.67188	2.64062	0.796875	0.0546875	4.48438	1.10938	21.5938	4.23438	7.05469	2.14062	34.6641	10.4297	2.54688	16.1172	8.67188	6.14844	0.328125	2.91406	16.9688	7.57812	5.40625	9.59375	18.1797	8.6875	9.54688	4.52344
n8	n8	1	0	12.9453	8.70312	4.32812	18.0078	17.9844	9.51562	4.72656	20.3281	7.88281	7.86719	7.6875	20.9375	5.03125	18.9609	7.42969	7.61719	0	9.61719	40.0703	27.4688	4.41406	2.94531	0.757812	0.125	5.46094	1.48438	21.9453	4.08594	6.57812	1.75781	38.75	10.6094	3.03125	15.0547	8.42969	5.40625	0.5625	3.05469	20.0078	9.50781	6.15625	11.1797	20.5156	10.2188	10.5703	4.84375
n9	n9	1	1	12.7891	9.85156	4.23438	17.0547	18.8281	8.65625	5.39844	21.3281	8.07031	7.47656	8.66406	23.8984	5	19.5391	8.64844	6.69531	0.3125	9.07031	39.3203	26.6172	3.64844	2.72656	1.10156	0.125	5.05469	1.25781	24.0703	4.24219	7.42188	2.4375	38.5547	11.2891	2.50781	15.5703	8.71094	6.03906	0.3125	2.85156	18.0625	8.85156	5.8125	11.4375	20.2812	9.45312	10.7891	4.49219
n10	n10	1	0	13.25	8.91406	4.32031	17.9297	18.4688	8.63281	4.9375	19.8906	8.09375	7.85156	7.33594	21.25	5.11719	19.6953	8.39062	7.28906	0.367188	8.83594	40.375	27.4609	3.70312	2.83594	0.820312	0.1875	5.28906	1.21094	22.8438	4.42969	7.1875	2.23438	39.6797	11.3984	2.69531	16.6953	8.89844	6.32812	0.25	3.32812	19.1719	9.24219	6.60156	10.875	20.6797	10.2734	10.5547	4.53906
n11	n11	1	1	12.9062	9.83594	4.28906	16.9453	20.0469	9.77344	5.73438	21.75	7.95312	7.80469	6.29688	20.7266	5.45312	20.5703	8.00781	7.75	0.117188	8.78125	39.4297	26.1953	3.32812	2.78906	0.96875	0	6.02344	1.46875	23.7969	4.74219	7.625	1.8125	40.8438	11.3047	2.86719	15.7344	9.02344	5.63281	0.257812	3.625	19.5938	9.39062	6.86719	10.1406	22.4062	9.32812	10.5938	4.54688
n13	n13	1	1	13.0625	8.35156	4.08594	15.5547	17.8281	9.32812	4.48438	20.5781	7.13281	7.23438	6.53125	20.3672	5.41406	18.1797	8.75	7.17969	0.0546875	8.76562	39.5625	26.5156	3.59375	2.75781	0.78125	0.078125	6.22656	1.1875	21.4219	4.52344	7.09375	1.48438	38.8125	11.6484	2.86719	16.1797	8.80469	6.21875	0.429688	3.14062	18.7891	8.54688	6.03125	10.1016	19.1562	9.32812	9.80469	4.53906
n14	n14	1	1	13.3281	8.46875	4.21094	15.3828	17.375	9.44531	4.55469	20.6797	7.11719	7.25	6.47656	20.5234	5.625	17.9453	8.5625	7.17969	0	8.65625	39.8984	26.0078	3.66406	2.77344	0.78125	0.0546875	6.07031	1.28125	21.4922	4.52344	6.92969	1.50781	38.7734	11.75	2.9375	16.0547	8.5625	5.98438	0.429688	3.17188	18.7109	8.47656	6.07812	10.3203	19.1406	9.42969	9.78906	4.5625
n16	n16	1	1	12.9531	8.14844	3.80469	16.2734	19.0938	9.64062	5.39062	20.7344	7.75	6.86719	7.23438	22.0469	5.33594	19.3281	7.71875	7.23438	0.015625	9.1875	40.3125	25.7031	4.03906	2.99219	0.75	0.140625	5.11719	1.28906	21.5703	4.73438	7.42969	1.92188	36.5312	10.6172	2.78906	15.7344	8.89844	6.03125	0.296875	3.10938	18.6094	8.84375	6.39062	9.64062	20.7578	10.5547	9.64062	5.32031
n17	n17	1	1	12.6953	8.54688	3.84375	15.8672	17.7422	9.01562	4.39844	20.4453	7.78125	7.08594	6.625	20.1094	5.01562	16.4219	8.05469	6.75781	0.25	8.51562	38.6641	26.4531	3.27344	2.625	0.734375	0.0703125	5.84375	1.21094	20.25	4.72656	6.96875	1.74219	36.5938	10.8906	2.625	15.5234	7.98438	5.59375	0.34375	2.80469	18.1016	8.84375	6.03906	10.4297	19.5938	8.83594	9.71094	4.33594
n18	n18	1	1	12.5547	8.24219	3.53906	16.8906	17.7109	8.73438	4.36719	21.3984	7.23438	7.13281	6.9375	19.4141	5.65625	17.3281	8.67188	7.14062	0.179688	7.57031	38.3984	24.7422	3.40625	2.61719	0.703125	0.117188	5.72656	1.28125	20.8828	4.08594	6.85938	2.20312	36.125	10.8906	2.70312	15.4297	7.53906	6.1875	0.242188	3.64062	18.3359	8.32812	6.13281	9.71875	18.6484	9.55469	10.0391	4.5
n19	n19	1	0	13.7969	10.0938	4.47656	20.5312	20.9453	10.3203	5.61719	22.5	9.28125	7.99219	8.5625	24.5781	4.76562	19.6953	8.38281	7.40625	0.335938	8.4375	41.0469	26.0312	3.89844	3.05469	0.726562	0.03125	6.5625	1.64062	21.9844	5	7.25781	2.08594	39.6016	11.3281	3.07812	15.3203	8.375	6.29688	0.265625	4.04688	20.7422	9.92969	6.75781	8.90625	21.7969	10.3281	9.85938	5.26562
n21	n21	1	1	13.3125	8.63281	4.29688	18.0625	19.0469	9.59375	5	22.3047	7.50781	6.89062	8.04688	21.9844	5.25	18.7422	8.60938	6.95312	0.0625	8.29688	40.1562	27.0859	4.03906	2.90625	0.71875	0.0859375	5.44531	1.53906	21.5156	5.17969	7.1875	1.48438	39.3984	11.4922	2.875	15.3203	8.41406	5.61719	0.34375	3.21875	19.5859	8.67188	6.59375	10.5234	21.1406	9.69531	10.1094	5.20312
n23	n23	1	1	12.9688	8.39844	4.35938	17.8438	19.6172	9.41406	5.46875	21.2656	7.85938	7.59375	8.61719	23.2812	6.41406	20.9453	8.97656	6.98438	0.242188	7.86719	40.6094	28.5938	4.29688	2.55469	0.96875	0.210938	6.39062	1.4375	22.7969	5.41406	7.63281	1.45312	38.9453	11.6719	2.82812	16.9453	8.26562	6.52344	0.414062	3.25	18.5625	9.14844	7.57812	9.57812	21.9531	10.0547	10.9219	4.46875
n25	n25	1	1	12.8594	8.96094	3.98438	16.4531	19.8516	8.96875	5.55469	18.625	6.09375	7.17969	6.78125	21.2812	5.63281	21.0469	8.20312	7.46094	0.609375	8.65625	38.9688	28.1953	3.84375	2.61719	0.789062	0.148438	5.98438	1.29688	23.7188	4.125	7.03125	1.71875	35.4141	10.6094	2.92969	15.1641	7.82812	5.70312	0.335938	3.21875	19.2734	9.0625	6.3125	9.89844	21.0391	9.01562	9.76562	4.3125
D_mean				12.9479	8.50911	4.09082	16.7572	19.0781	9.16829	5.06478	21.2786	7.48112	7.24219	7.23633	21.5677	5.28288	19.6429	8.50065	6.83105	0.200846	8.17611	38.766	26.348	4.10352	2.73242	0.806315	0.0820312	5.83105	1.38704	22.3379	4.69043	7.43164	2.01367	39.3128	11.2803	2.88379	16.0127	8.31901	5.98405	0.307292	3.15723	18.7389	8.65462	6.85059	9.91081	21.0312	9.3304	10.5277	4.55632
D_SD				0.625907	0.556126	0.206966	1.21763	1.23838	0.405446	0.356308	1.40028	0.561815	0.481137	0.749424	1.81354	0.402891	1.42498	0.61438	0.374326	0.138447	0.92962	1.69701	1.02315	0.410333	0.514699	0.132302	0.0455543	0.708842	0.165552	1.45956	0.384744	0.59184	0.534001	2.03019	0.794749	0.238442	0.808144	0.719236	0.378798	0.0897489	0.436257	0.979101	0.587843	0.57532	0.7836	1.76645	0.943823	0.729993	0.949694
N_mean				13.0768	8.8776	4.18707	17.1328	18.8733	9.21311	5.07248	21.3763	7.71571	7.36155	7.38238	21.5781	5.33898	19.158	8.39236	7.12543	0.200521	8.60677	39.8368	26.8442	3.79991	2.78472	0.830729	0.0976562	5.76345	1.34375	22.2708	4.56076	7.10286	1.85634	38.309	11.2305	2.84462	15.9023	8.55729	6.00391	0.322049	3.25998	19.0195	8.86155	6.40017	10.138	20.4501	9.52344	10.0994	4.68056
N_SD				0.346426	0.620781	0.259312	1.26819	1.05897	0.551274	0.44517	1.21376	0.701582	0.464671	0.802874	1.39058	0.431352	1.31485	0.383169	0.335092	0.159006	0.514007	0.795246	0.95284	0.316452	0.154336	0.108914	0.0550637	0.58467	0.148111	1.18106	0.372999	0.383541	0.337278	1.79508	0.454709	0.178573	0.60045	0.428537	0.342549	0.0906961	0.318777	0.920309	0.544973	0.526297	0.639801	1.17641	0.587727	0.56793	0.398612
%_diff				0.00990644	0.0423875	0.0232537	0.0221689	-0.010796	0.00487595	0.00151994	0.00457889	0.0308738	0.0163462	0.0199813	0.000482859	0.0105628	-0.0249952	-0.0128207	0.0421853	-0.00162206	0.0513218	0.0272473	0.018657	-0.076828	0.0189592	0.029827	0.173913	-0.0116607	-0.0317082	-0.00300647	-0.0280322	-0.0452408	-0.0813099	-0.0258638	-0.00442497	-0.0136761	-0.00691533	0.0282386	0.00331279	0.0468966	0.0320252	0.0148628	0.0236265	-0.0679829	0.022666	-0.0280205	0.0204769	-0.0415257	0.026901
p				0.400673	0.0546097	0.20453	0.34035	0.567455	0.773139	0.95226	0.810445	0.252377	0.42229	0.552206	0.983296	0.670535	0.261014	0.487661	0.0107926	0.994508	0.0634794	0.010187	0.113932	0.00994084	0.641673	0.51611	0.334965	0.736918	0.378401	0.870205	0.278401	0.0353941	0.250609	0.0980975	0.799224	0.546133	0.614447	0.189066	0.859951	0.603328	0.38309	0.347459	0.246417	0.0120202	0.307594	0.208818	0.420892	0.0386817	0.568081
[truncated: 28 more columns]

## Sheet: Spectroscopy_Longitudinal
Subject	TP2_hippo_incl	TP1_hippo_incl	Include	absTP2_Hippo_LCModel.GABA	absTP1_Hippo_LCModel.GABA	GABA_diff	absTP2_Hippo_LCModel.Glu	absTP1_Hippo_LCModel.Glu	Glu_diff	absTP2_Hippo_LCModel.PCh	absTP1_Hippo_LCModel.PCh	PCh_diff	absTP2_Hippo_LCModel.Ins	absTP1_Hippo_LCModel.Ins	Ins_diff	absTP2_Hippo_LCModel.NAA	absTP1_Hippo_LCModel.NAA	NAA_diff	absTP2_Hippo_LCModel.GPC+PCh	absTP1_Hippo_LCModel.GPC+PCh	tCho_diff	absTP2_Hippo_LCModel.NAA+NAAG	absTP1_Hippo_LCModel.NAA+NAAG	tNAA_diff	absTP2_Hippo_LCModel.Cr+PCr	absTP1_Hippo_LCModel.Cr+PCr	tCr_diff	absTP2_Hippo_LCModel.Glu+Gln	absTP1_Hippo_LCModel.Glu+Gln	tGlx_diff
D1	1	1	1	795.799	578.553	217.246	2580	2170	410	342.249	268.495	73.754	1860	1090	770	2840	2030	810	412.181	268.495	143.686	3030	2260	770	2170	1640	530	3460	2880	580
D2	1	1	1	931.411	810.551	120.86	2710	2070	640	351.515	286.141	65.374	2090	1240	850	2790	2220	570	431.624	286.141	145.483	3120	2380	740	2250	1770	480	3740	3030	710
D3	1	1	1	1060	621.663	438.337	3010	1950	1060	245.89	217.536	28.354	1970	1130	840	2920	1950	970	411.997	217.536	194.461	3250	1950	1300	2240	1530	710	4130	2810	1320
D4	1	1	1	1050	788.53	261.47	2630	1980	650	314.765	229.236	85.529	2130	1430	700	2560	1820	740	419.628	409.632	9.996	2930	2170	760	2240	1700	540	3770	2860	910
D7	1	1	1	812.765	781.749	31.016	2670	2470	200	257.754	226.982	30.772	1950	1850	100	2600	2540	60	385.836	285.644	100.192	2930	2900	30	2050	1950	100	3590	3710	-120
D8	1	1	1	633.943	790.879	-156.936	2400	2350	50	300.481	229.527	70.954	1680	1800	-120	2350	2140	210	367.778	289.443	78.335	2670	2580	90	2050	1790	260	3400	3350	50
D9	1	1	1	1080	758.429	321.571	2820	2630	190	354.86	241.732	113.128	1790	1730	60	2940	2460	480	445.759	339.9	105.859	3320	2730	590	2290	1990	300	3970	3670	300
D10	1	1	1	689.305	840.904	-151.599	2670	2770	-100	353.789	199.678	154.111	1940	1880	60	2610	2570	40	405.273	313.364	91.909	2880	2960	-80	2200	2020	180	3730	3880	-150
D11	1	1	1	933.797	814.583	119.214	2310	2620	-310	388.812	238.33	150.482	1670	1720	-50	2260	2250	10	388.812	304.078	84.734	2630	2620	10	2030	1890	140	3340	3590	-250
D12	1	1	1	937.215	535.195	402.02	2600	2530	70	328.306	244.489	83.817	2210	2100	110	2590	2240	350	406.65	291.261	115.389	3020	2660	360	2210	2020	190	3510	3700	-190
D13	1	1	1	838.542	1010	-171.458	2940	2820	120	425.318	195.251	230.067	2090	1970	120	2950	2710	240	425.318	330.327	94.991	3220	3010	210	2350	2120	230	4100	3800	300
D14	1	1	1	506	711.561	-205.561	2580	2600	-20	295.729	238.222	57.507	2040	1740	300	2460	2490	-30	360.656	287.85	72.806	2750	2680	70	2150	1920	230	3580	3610	-30
D15	1	1	1	755.245	950.524	-195.279	2350	2590	-240	285.776	213.277	72.499	2000	2000	0	2090	2510	-420	351.221	305.39	45.831	2520	2820	-300	2030	2030	0	3390	3590	-200
D16	1	1	1	623.43	1170	-546.57	2380	2870	-490	297.546	98.132	199.414	1810	2130	-320	2160	2830	-670	362.347	312.021	50.326	2510	3120	-610	2020	2100	-80	3360	3780	-420
D18	1	1	1	859.918	1100	-240.082	2270	2600	-330	255.988	266.134	-10.146	1490	1710	-220	2400	2390	10	372.247	328.023	44.224	2720	2870	-150	1860	1950	-90	3130	3600	-470
D19	1	1	1	826.506	748.766	77.74	2360	2400	-40	382.423	322.232	60.191	2010	1820	190	2520	2340	180	406.238	322.232	84.006	2860	2600	260	2160	1980	180	3350	3470	-120
D20	1	1	1	932.096	1060	-127.904	2690	2760	-70	258.168	194.304	63.864	1920	2310	-390	2930	2720	210	412.097	347.132	64.965	3360	3150	210	2280	2110	170	3710	3750	-40
D21	1	1	1	748.612	930.516	-181.904	2330	2400	-70	300.551	246.663	53.888	2030	2040	-10	2210	2320	-110	384.15	371.417	12.733	2520	2680	-160	2050	1900	150	3440	3150	290
D22	1	1	1	680.723	769.781	-89.058	2360	2410	-50	321.158	279.894	41.264	1860	2010	-150	2520	2190	330	352.015	332.306	19.709	2780	2600	180	2060	1960	100	3250	3570	-320
D23	1	1	1	594.454	832.791	-238.337	2380	2200	180	354.956	256.397	98.559	1800	1580	220	2460	2000	460	402.06	299.297	102.763	2670	2340	330	2050	1750	300	3300	3090	210
D24	1	1	1	1090	827.778	262.222	2480	2800	-320	275.652	229.419	46.233	1930	1860	70	2600	2480	120	425.986	325.64	100.346	3060	2720	340	2200	2070	130	3500	3910	-410
D25	1	1	1	1070	685.092	384.908	2810	2530	280	209.684	184.854	24.83	2000	2170	-170	2620	2540	80	396.235	328.313	67.922	3060	2830	230	2200	2020	180	3970	3410	560
Mean				838.625	823.538	15.0871	2560.45	2478.18	82.2727	313.699	232.133	81.5657	1921.36	1786.82	134.545	2562.73	2351.82	210.909	396.641	313.429	83.2121	2900.45	2665	235.455	2142.73	1918.64	224.091	3578.18	3464.09	114.091
SD				173.019	161.503	262.626	214.731	269.808	365.994	52.763	44.4908	57.655	168.022	327.362	359.043	257.334	264.461	378.404	26.8581	38.1496	44.5608	261.543	303.107	417.609	117.724	159.383	196.557	279.517	343.95	468.49
CV				0.206312		17.4073			4.44855			0.706854			2.66856			1.79416			0.535509			1.77363			0.877133			4.10628
paired ttest/%increase				0.790213	0.0183198		0.303694	0.0331988		1.43624e-06	0.351375		0.0933753	0.0752989		0.0162011	0.0896792		1.86984e-08	0.265489		0.0151587	0.0883507		2.65125e-05	0.116797		0.266206	0.0329353
Subject	TP2_hippo_incl	TP1_hippo_incl	Include	absTP2_Hippo_LCModel.GABA	absTP1_Hippo_LCModel.GABA	GABA_diff	absTP2_Hippo_LCModel.Glu	absTP1_Hippo_LCModel.Glu	Glu_diff	absTP2_Hippo_LCModel.PCh	absTP1_Hippo_LCModel.PCh	PCh_diff	absTP2_Hippo_LCModel.Ins	absTP1_Hippo_LCModel.Ins	Ins_diff	absTP2_Hippo_LCModel.NAA	absTP1_Hippo_LCModel.NAA	NAA_diff	absTP2_Hippo_LCModel.GPC+PCh	absTP1_Hippo_LCModel.GPC+PCh	tCho_diff	absTP2_Hippo_LCModel.NAA+NAAG	absTP1_Hippo_LCModel.NAA+NAAG	tNAA_diff	absTP2_Hippo_LCModel.Cr+PCr	absTP1_Hippo_LCModel.Cr+PCr	tCr_diff	absTP2_Hippo_LCModel.Glu+Gln	absTP1_Hippo_LCModel.Glu+Gln	tGlx_diff
N2	1	1	1	749.65	761.09	-11.44	2370	2390	-20	307.287	245.525	61.762	1800	1580	220	2380	2170	210	383.714	283.88	99.834	2670	2500	170	2120	1850	270	3280	3540	-260
N3	1	1	1	687.411	641.112	46.299	2160	2330	-170	279.609	229.189	50.42	1800	1600	200	2140	2220	-80	371.659	293.593	78.066	2540	2570	-30	1880	1830	50	3080	3220	-140
N4	1	1	1	723.757	389.034	334.723	2380	1870	510	329.217	247.413	81.804	1770	1010	760	2190	1860	330	365.595	247.413	118.182	2550	2020	530	1970	1530	440	3310	2680	630
N6	1	1	1	715.978	649.054	66.924	2380	2040	340	299.502	253.475	46.027	1790	1200	590	2030	1720	310	400.693	253.475	147.218	2420	1950	470	1860	1610	250	3750	2990	760
N7	1	1	1	758.223	1060	-301.777	2500	3260	-760	279.158	455.108	-175.95	1760	2130	-370	2350	3420	-1070	358.806	455.108	-96.302	2680	3810	-1130	1930	2760	-830	3460	4800	-1340
N8	1	1	1	730.725	868.89	-138.165	2530	2760	-230	365.879	262.252	103.627	2040	1870	170	2570	2550	20	422.58	318.123	104.457	2640	2900	-260	2270	1980	290	3650	3690	-40
N9	1	1	1	767.834	762.315	5.519	2200	2390	-190	308.999	263.775	45.224	1830	1840	-10	2040	2410	-370	398.172	298.907	99.265	2400	2670	-270	1870	1960	-90	3130	3350	-220
N10	1	1	1	855.233	744.391	110.842	2520	2290	230	350.935	254.14	96.795	1800	1750	50	2400	2110	290	410.364	330.173	80.191	2730	2410	320	1910	1830	80	3360	3220	140
N11	1	1	1	698.221	916.996	-218.775	2310	2490	-180	271.046	197.724	73.322	1620	1770	-150	2440	2150	290	367.473	306.636	60.837	2690	2510	180	1900	1770	130	3290	3530	-240
N13	1	1	1	1200	646.848	553.152	2740	2900	-160	439.133	283.291	155.842	2240	2210	30	2270	2580	-310	439.133	296.557	142.576	3110	3050	60	2140	2250	-110	3940	4120	-180
N14	1	1	1	1110	544.263	565.737	2900	2020	880	382.43	212.118	170.312	2220	1350	870	2810	1860	950	426.203	260.118	166.085	3170	2060	1110	2240	1460	780	4090	2830	1260
N15	1	1	1	912.907	701.401	211.506	2680	2420	260	363.745	290.898	72.847	1960	1630	330	2580	2600	-20	422.205	292.146	130.059	2900	2910	-10	2150	1990	160	3720	3780	-60
N16	1	1	1	668.066	707.902	-39.836	2380	2760	-380	370.253	278.442	91.811	2040	2120	-80	2270	2620	-350	415.105	349.986	65.119	2520	3080	-560	2010	2260	-250	3270	3780	-510
N17	1	1	1	549.852	558.778	-8.926	2220	2320	-100	345.343	280.995	64.348	1970	1910	60	2320	2400	-80	393.834	302.944	90.89	2540	2750	-210	1990	1990	0	3290	3290	0
N18	1	1	1	700.649	911.935	-211.286	2390	2100	290	353.359	157.513	195.846	2140	1690	450	2270	2170	100	405.622	275.59	130.032	2500	2500	0	2090	1710	380	3400	3020	380
N19	1	1	1	965.576	826.084	139.492	2520	2180	340	314.713	234.376	80.337	1880	1750	130	2680	2200	480	410.946	300.576	110.37	2990	2430	560	2170	1780	390	3510	3180	330
N20	1	1	1	980.3	1040	-59.7	2540	2830	-290	337.713	280.586	57.127	1940	1860	80	2630	2750	-120	422.292	356.004	66.288	3060	3110	-50	2140	2110	30	3500	3760	-260
N21	1	1	1	964.168	790.382	173.786	2700	2630	70	387.925	266.539	121.386	2030	1740	290	2820	2460	360	430.592	305.959	124.633	3170	2770	400	2160	1880	280	3870	3660	210
N22	1	1	1	640.064	601.871	38.193	2290	2460	-170	285.099	237.863	47.236	1770	1850	-80	2230	2690	-460	374.599	305.199	69.4	2530	2890	-360	1900	2020	-120	3140	3310	-170
N23	1	1	1	555.177	843.159	-287.982	2310	2840	-530	324.891	229.342	95.549	1860	1820	40	1930	2610	-680	371.219	356.298	14.921	2300	2860	-560	1910	2020	-110	3280	3730	-450
N25	1	1	1	935.407	924.145	11.262	2740	2750	-10	358.667	318.203	40.464	2120	1740	380	2720	2780	-60	414.121	318.203	95.918	3060	3020	40	2160	2060	100	3900	3560	340
Mean				803.295	756.65	46.6451	2464.76	2477.62	-12.8571	335.948	260.894	75.0541	1922.86	1734.29	188.571	2384.29	2396.67	-12.381	400.235	309.852	90.3828	2722.38	2703.33	19.0476	2036.67	1935.71	100.952	3486.67	3478.1	8.57143
SD				172.955	167.66	234.335	199.665	346.784	372.426	42.5333	56.7262	71.5313	167.336	286.611	299.771	257.285	384.231	441.168	24.3531	44.7228	55.1848	273.128	427.075	479.092	134.102	281.453	319.592	292.956	468.141	528.141
CV				0.215307		5.02379			-28.9665			0.953064			1.5897			-35.6328			0.610568			25.1523			3.16577			61.6164
paired ttest/%increase				0.372541	0.0616469		0.875884	-0.00518931		0.000106945	0.287681		0.00920291	0.108731		0.898954	-0.00516591		3.0794e-07	0.291697		0.857265	0.00704597		0.16324	0.0521525		0.941453	0.0024644
%diff (N-D)
ttest of differences
